# Supplementary material for: CompScore: boosting structure-based virtual screening performance by incorporating docking scoring functions components into consensus scoring
Source: bioRxiv or medRxiv preprint supplement (doi:10.1101/550590), 2019-04-04
Supplement: Supplementary file [file media-1.pdf]

## Supplementary Data for article

### **CompScore: boosting structure-based virtual screening performance by incorporating docking scoring functions components into consensus scoring**

Yunierkis Perez-Castillo<sup>1,\*</sup>, Stellamaris Sotomayor-Burneo<sup>2</sup>, Karina Jimenes-Vargas<sup>3</sup>, Mario Gonzalez-Rodriguez<sup>4</sup>, Maykel Cruz-Monteagudo<sup>5,7,8</sup>, Vinicio Armijos-Jaramillo<sup>6</sup>, M. Natália D. S. Cordeiro<sup>7</sup>, Fernanda Borges<sup>8</sup>, Aminaél Sánchez-Rodríguez<sup>2</sup>, Eduardo Tejera<sup>6</sup>

<sup>1</sup> Bio-Cheminformatics Research Group and Escuela de Ciencias Físicas y Matemáticas, Universidad de Las Americas. Quito 170504, Ecuador

<sup>2</sup> Departamento de Ciencias Biológicas, Universidad Técnica Particular de Loja. Loja 110107, Ecuador

<sup>3</sup> Dirección General de Investigación, Universidad de Las Americas. Quito 170504, Ecuador

<sup>4</sup> SI<sup>2</sup> Lab, Universidad de Las Americas, Quito 170504, Ecuador

<sup>5</sup> Department of General Education, West Coast University—Miami Campus. Doral. Florida 33178. USA

<sup>6</sup> Bio-Cheminformatics Research Group and Facultad de Ingeniería y Ciencias Aplicadas, Universidad de Las Américas. Quito 170504, Ecuador.

<sup>7</sup> REQUIMTE/Departamento de Química e Bioquímica, Faculdade de Ciências, Universidade do Porto. Porto 4169-007, Portugal

<sup>8</sup> CIQUP/Departamento de Química e Bioquímica, Faculdade de Ciências. Universidade do Porto. Porto 4169-007. Portugal

## Contents

|                                                                                                                                                                                                                                          |    |
|------------------------------------------------------------------------------------------------------------------------------------------------------------------------------------------------------------------------------------------|----|
| Table TS1. Composition of the datasets employed in our studies .....                                                                                                                                                                     | 3  |
| Table TS2. VS performance of different scoring methods for the DUD-E database when BEDROC with $\alpha$ is set to 160.9 is used as model selection criterion .....                                                                       | 6  |
| Table TS3. VS performance of different scoring methods for the DUD-E database when EF at the first 1% of screened data is used as model selection criterion.....                                                                         | 10 |
| Table TS4. VS performance of different scoring methods for the DUD-E database when BEDROC with $\alpha$ is set to 160.9 is used as model selection criterion and weighted scoring components are employed                                | 14 |
| Table TS5. VS performance of different scoring methods for the DUD-E database when EF at the first 1% of screened data is used as model selection criterion and weighted scoring components are employed .....                           | 18 |
| Table TS6. VS performance on external validation experiments. Enrichment is computed as BEDROC with $\alpha$ is set to 160.9. Results are presented as the average BEDROC over the 100 training/external partitions of each target ..... | 22 |

Table TS1. Composition of the datasets employed in our studies

| Target <sup>(a)</sup> | Num. Ligands <sup>(b)</sup> | Num. Decoys <sup>(c)</sup> | Total molecules <sup>(d)</sup> |
|-----------------------|-----------------------------|----------------------------|--------------------------------|
| aa2ar                 | 480                         | 31281                      | 31761                          |
| abl1                  | 181                         | 10609                      | 10790                          |
| ace                   | 281                         | 16795                      | 17076                          |
| aces                  | 442                         | 22384                      | 22826                          |
| ada                   | 93                          | 5427                       | 5520                           |
| ada17                 | 532                         | 35723                      | 36255                          |
| adrb1                 | 247                         | 15125                      | 15372                          |
| adrb2                 | 229                         | 13230                      | 13459                          |
| akt1                  | 289                         | 16048                      | 16337                          |
| akt2                  | 116                         | 6770                       | 6886                           |
| aldr                  | 159                         | 8925                       | 9084                           |
| ampc                  | 48                          | 2829                       | 2877                           |
| andr                  | 222                         | 13062                      | 13284                          |
| aofb                  | 119                         | 6730                       | 6849                           |
| bace1                 | 279                         | 18025                      | 18304                          |
| braf                  | 152                         | 9903                       | 10055                          |
| cah2                  | 491                         | 30981                      | 31472                          |
| casp3                 | 199                         | 10674                      | 10873                          |
| cdk2                  | 474                         | 27757                      | 28231                          |
| comt                  | 41                          | 3824                       | 3865                           |
| cp2c9                 | 119                         | 7246                       | 7365                           |
| cp3a4                 | 170                         | 11760                      | 11930                          |
| csf1r                 | 166                         | 12087                      | 12253                          |
| cxcr4                 | 40                          | 3401                       | 3441                           |
| def                   | 99                          | 5689                       | 5788                           |
| dhi1                  | 330                         | 19107                      | 19437                          |
| dpp4                  | 532                         | 40776                      | 41308                          |
| drd3                  | 480                         | 33359                      | 33839                          |
| dyr                   | 229                         | 17098                      | 17327                          |
| egfr                  | 540                         | 34869                      | 35409                          |
| esr1                  | 379                         | 20413                      | 20792                          |
| esr2                  | 366                         | 20087                      | 20453                          |
| fa10                  | 536                         | 28143                      | 28679                          |
| fa7                   | 114                         | 6213                       | 6327                           |
| fabp4                 | 47                          | 2683                       | 2730                           |
| fak1                  | 99                          | 5316                       | 5415                           |
| fgfr1                 | 135                         | 7785                       | 7920                           |
| fkbl1a                | 111                         | 5793                       | 5904                           |
| fnta                  | 592                         | 51258                      | 51850                          |

|        |     |       |       |
|--------|-----|-------|-------|
| fpps   | 79  | 8536  | 8615  |
| gcr    | 206 | 14146 | 14352 |
| glcm   | 54  | 3739  | 3793  |
| gria2  | 157 | 11688 | 11845 |
| grik1  | 100 | 6478  | 6578  |
| hdac2  | 179 | 10155 | 10334 |
| hdac8  | 168 | 10426 | 10594 |
| hivint | 99  | 6631  | 6730  |
| hivpr  | 533 | 35564 | 36097 |
| hivrt  | 334 | 18293 | 18627 |
| hmdh   | 170 | 8726  | 8896  |
| hs90a  | 78  | 4822  | 4900  |
| hxx4   | 92  | 4385  | 4477  |
| igf1r  | 148 | 9267  | 9415  |
| inha   | 44  | 2293  | 2337  |
| ital   | 138 | 8459  | 8597  |
| jak2   | 107 | 6450  | 6557  |
| kif11  | 116 | 6832  | 6948  |
| kit    | 166 | 10404 | 10570 |
| kith   | 57  | 2845  | 2902  |
| kpcb   | 133 | 8644  | 8777  |
| lck    | 419 | 27279 | 27698 |
| lkha4  | 167 | 7448  | 7615  |
| mapk2  | 100 | 6112  | 6212  |
| mcr    | 51  | 4157  | 4208  |
| met    | 166 | 11207 | 11373 |
| mk01   | 78  | 4423  | 4501  |
| mk10   | 104 | 6574  | 6678  |
| mk14   | 578 | 35715 | 36293 |
| mmp13  | 572 | 37027 | 37599 |
| mp2k1  | 120 | 8057  | 8177  |
| nos1   | 99  | 8001  | 8100  |
| nram   | 98  | 6181  | 6279  |
| pa2ga  | 99  | 5139  | 5238  |
| parp1  | 507 | 29928 | 30435 |
| pde5a  | 398 | 27437 | 27835 |
| pgh1   | 184 | 10312 | 10496 |
| pgh2   | 415 | 21362 | 21777 |
| plk1   | 106 | 6767  | 6873  |
| pnph   | 103 | 6901  | 7004  |
| ppara  | 372 | 17807 | 18179 |
| ppard  | 240 | 11801 | 12041 |
| pparg  | 482 | 25094 | 25576 |

|       |     |       |       |
|-------|-----|-------|-------|
| prgr  | 247 | 14248 | 14495 |
| ptn1  | 130 | 7198  | 7328  |
| pur2  | 50  | 2683  | 2733  |
| pygm  | 77  | 3927  | 4004  |
| pyrd  | 111 | 6091  | 6202  |
| reni  | 104 | 6943  | 7047  |
| rock1 | 100 | 6274  | 6374  |
| rxra  | 120 | 6270  | 6390  |
| sahh  | 60  | 2821  | 2881  |
| src   | 522 | 34184 | 34706 |
| tgfr1 | 133 | 8409  | 8542  |
| thb   | 97  | 6375  | 6472  |
| thrb  | 456 | 26863 | 27319 |
| try1  | 448 | 25787 | 26235 |
| tryb1 | 148 | 7609  | 7757  |
| tysy  | 109 | 6715  | 6824  |
| urok  | 162 | 9810  | 9972  |
| vgfr2 | 402 | 22623 | 23025 |
| wee1  | 102 | 6136  | 6238  |
| xiap  | 100 | 5130  | 5230  |

(a) Target identification on the DUD-E database (<http://dude.docking.org/>)

(b) Number of ligands

(c) Number of decoy molecules

(d) Total number of molecules per target

Table TS2. VS performance of different scoring methods for the DUD-E database when BEDROC with  $\alpha$  is set to 160.9 is used as model selection criterion

| Target <sup>(a)</sup> | CompScore                 |                       |                             |                                  |                               | Exhaustive Search         |                       |                             |                                  |                               | Best Individual Scoring Component |                             |                                  | All Scoring Components |
|-----------------------|---------------------------|-----------------------|-----------------------------|----------------------------------|-------------------------------|---------------------------|-----------------------|-----------------------------|----------------------------------|-------------------------------|-----------------------------------|-----------------------------|----------------------------------|------------------------|
|                       | Model Size <sup>(b)</sup> | BEDROC <sup>(c)</sup> | Boot. BEDROC <sup>(d)</sup> | Std. Boot. BEDROC <sup>(e)</sup> | Time (seconds) <sup>(f)</sup> | Model Size <sup>(b)</sup> | BEDROC <sup>(c)</sup> | Boot. BEDROC <sup>(d)</sup> | Std. Boot. BEDROC <sup>(e)</sup> | Time (seconds) <sup>(f)</sup> | BEDROC <sup>(c)</sup>             | Boot. BEDROC <sup>(d)</sup> | Std. Boot. BEDROC <sup>(e)</sup> | BEDROC <sup>(c)</sup>  |
| aa2ar                 | 15                        | 0.73                  | 0.73                        | 0.02                             | 1088.92                       | 2                         | 0.53                  | 0.52                        | 0.03                             | 336.69                        | 0.55                              | 0.55                        | 0.02                             | 0.43                   |
| abl1                  | 10                        | 0.6                   | 0.6                         | 0.04                             | 203.64                        | 2                         | 0.41                  | 0.41                        | 0.05                             | 110.63                        | 0.49                              | 0.48                        | 0.04                             | 0.17                   |
| ace                   | 15                        | 0.52                  | 0.51                        | 0.03                             | 388.91                        | 2                         | 0.32                  | 0.32                        | 0.03                             | 172.19                        | 0.3                               | 0.3                         | 0.03                             | 0.04                   |
| aces                  | 7                         | 0.66                  | 0.66                        | 0.03                             | 481.02                        | 3                         | 0.55                  | 0.55                        | 0.03                             | 265.62                        | 0.46                              | 0.46                        | 0.03                             | 0.13                   |
| ada                   | 14                        | 0.75                  | 0.74                        | 0.04                             | 93.63                         | 2                         | 0.59                  | 0.59                        | 0.06                             | 60.19                         | 0.33                              | 0.33                        | 0.06                             | 0.12                   |
| ada17                 | 5                         | 0.78                  | 0.78                        | 0.02                             | 1258.96                       | 1                         | 0.64                  | 0.64                        | 0.02                             | 430.22                        | 0.72                              | 0.72                        | 0.02                             | 0.33                   |
| adrb1                 | 9                         | 0.48                  | 0.48                        | 0.04                             | 349.04                        | 5                         | 0.26                  | 0.26                        | 0.03                             | 175.22                        | 0.16                              | 0.16                        | 0.03                             | 0.16                   |
| adrb2                 | 12                        | 0.42                  | 0.42                        | 0.04                             | 326.43                        | 3                         | 0.2                   | 0.2                         | 0.03                             | 131.30                        | 0.23                              | 0.23                        | 0.04                             | 0.16                   |
| akt1                  | 17                        | 0.68                  | 0.68                        | 0.03                             | 495.25                        | 2                         | 0.53                  | 0.53                        | 0.03                             | 170.74                        | 0.45                              | 0.44                        | 0.04                             | 0.24                   |
| akt2                  | 12                        | 0.64                  | 0.63                        | 0.05                             | 110.44                        | 2                         | 0.45                  | 0.45                        | 0.06                             | 75.66                         | 0.43                              | 0.42                        | 0.06                             | 0.15                   |
| aldr                  | 18                        | 0.6                   | 0.59                        | 0.04                             | 148.11                        | 1                         | 0.54                  | 0.53                        | 0.04                             | 94.55                         | 0.54                              | 0.53                        | 0.05                             | 0.07                   |
| ampc                  | 14                        | 0.66                  | 0.65                        | 0.07                             | 35.88                         | 4                         | 0.18                  | 0.17                        | 0.07                             | 35.55                         | 0.16                              | 0.16                        | 0.07                             | 0                      |
| andr                  | 13                        | 0.54                  | 0.54                        | 0.04                             | 208.22                        | 6                         | 0.28                  | 0.28                        | 0.04                             | 129.88                        | 0.28                              | 0.28                        | 0.04                             | 0.19                   |
| aofb                  | 18                        | 0.4                   | 0.4                         | 0.05                             | 107.99                        | 8                         | 0.28                  | 0.28                        | 0.05                             | 71.74                         | 0.21                              | 0.21                        | 0.05                             | 0.06                   |
| bace1                 | 11                        | 0.32                  | 0.32                        | 0.03                             | 523.42                        | 4                         | 0.23                  | 0.23                        | 0.03                             | 187.28                        | 0.23                              | 0.23                        | 0.03                             | 0.16                   |
| braf                  | 8                         | 0.61                  | 0.61                        | 0.04                             | 161.23                        | 1                         | 0.32                  | 0.32                        | 0.05                             | 102.44                        | 0.35                              | 0.35                        | 0.05                             | 0.23                   |
| cah2                  | 22                        | 0.52                  | 0.52                        | 0.03                             | 1252.91                       | 3                         | 0.23                  | 0.23                        | 0.02                             | 374.27                        | 0.17                              | 0.17                        | 0.02                             | 0.08                   |
| casp3                 | 12                        | 0.37                  | 0.37                        | 0.05                             | 306.41                        | 2                         | 0.21                  | 0.21                        | 0.04                             | 107.80                        | 0.19                              | 0.19                        | 0.04                             | 0.04                   |
| cdk2                  | 17                        | 0.47                  | 0.47                        | 0.03                             | 760.82                        | 6                         | 0.37                  | 0.37                        | 0.03                             | 317.24                        | 0.34                              | 0.34                        | 0.03                             | 0.23                   |
| comt                  | 21                        | 0.99                  | 0.99                        | 0.01                             | 56.58                         | 1                         | 0.92                  | 0.92                        | 0.03                             | 43.52                         | 0.94                              | 0.94                        | 0.02                             | 0.45                   |
| cp2c9                 | 17                        | 0.25                  | 0.25                        | 0.05                             | 121.45                        | 6                         | 0.12                  | 0.12                        | 0.04                             | 76.81                         | 0.11                              | 0.11                        | 0.04                             | 0.06                   |
| cp3a4                 | 16                        | 0.26                  | 0.26                        | 0.04                             | 275.18                        | 3                         | 0.18                  | 0.17                        | 0.04                             | 115.98                        | 0.16                              | 0.17                        | 0.04                             | 0.07                   |
| csf1r                 | 9                         | 0.53                  | 0.53                        | 0.04                             | 238.6                         | 1                         | 0.35                  | 0.35                        | 0.04                             | 121.08                        | 0.35                              | 0.34                        | 0.04                             | 0.12                   |

|        |    |      |      |      |         |   |      |      |      |        |      |      |      |      |
|--------|----|------|------|------|---------|---|------|------|------|--------|------|------|------|------|
| cxcr4  | 19 | 0.71 | 0.7  | 0.07 | 45.11   | 2 | 0.43 | 0.42 | 0.08 | 40.11  | 0.3  | 0.3  | 0.08 | 0.15 |
| def    | 15 | 0.91 | 0.91 | 0.02 | 93.7    | 1 | 0.67 | 0.67 | 0.05 | 60.94  | 0.78 | 0.78 | 0.04 | 0.19 |
| dhi1   | 15 | 0.35 | 0.35 | 0.03 | 359.7   | 3 | 0.23 | 0.23 | 0.03 | 222.89 | 0.19 | 0.19 | 0.03 | 0.05 |
| dpp4   | 10 | 0.64 | 0.64 | 0.02 | 1482.24 | 2 | 0.53 | 0.53 | 0.02 | 437.95 | 0.5  | 0.51 | 0.02 | 0.19 |
| drd3   | 11 | 0.43 | 0.43 | 0.03 | 1093.71 | 5 | 0.24 | 0.24 | 0.02 | 410.68 | 0.17 | 0.17 | 0.02 | 0.04 |
| dyr    | 17 | 0.75 | 0.75 | 0.03 | 517.59  | 3 | 0.64 | 0.64 | 0.03 | 190.07 | 0.61 | 0.61 | 0.03 | 0.45 |
| egfr   | 10 | 0.75 | 0.75 | 0.02 | 1074.18 | 5 | 0.49 | 0.49 | 0.02 | 392.78 | 0.45 | 0.44 | 0.03 | 0.36 |
| esr1   | 17 | 0.75 | 0.75 | 0.02 | 456.77  | 2 | 0.69 | 0.69 | 0.03 | 219.79 | 0.67 | 0.67 | 0.03 | 0.11 |
| esr2   | 14 | 0.74 | 0.74 | 0.02 | 482.85  | 3 | 0.62 | 0.62 | 0.03 | 229.86 | 0.6  | 0.6  | 0.03 | 0.14 |
| fa10   | 9  | 0.73 | 0.73 | 0.02 | 674.64  | 2 | 0.63 | 0.63 | 0.02 | 310.53 | 0.59 | 0.59 | 0.02 | 0.1  |
| fa7    | 16 | 0.95 | 0.95 | 0.01 | 101.9   | 1 | 0.9  | 0.89 | 0.02 | 69.12  | 0.9  | 0.9  | 0.02 | 0.23 |
| fabp4  | 18 | 0.78 | 0.78 | 0.06 | 35.86   | 1 | 0.7  | 0.69 | 0.07 | 34.33  | 0.7  | 0.69 | 0.07 | 0.1  |
| fak1   | 12 | 0.69 | 0.69 | 0.05 | 100.95  | 4 | 0.54 | 0.54 | 0.06 | 60.17  | 0.5  | 0.49 | 0.07 | 0.27 |
| fgfr1  | 12 | 0.55 | 0.54 | 0.05 | 152.11  | 4 | 0.39 | 0.39 | 0.05 | 83.57  | 0.26 | 0.26 | 0.04 | 0.23 |
| fkb1a  | 22 | 0.71 | 0.71 | 0.05 | 106.23  | 7 | 0.38 | 0.38 | 0.06 | 64.28  | 0.34 | 0.34 | 0.06 | 0.14 |
| fnta   | 17 | 0.23 | 0.23 | 0.02 | 1631.51 | 2 | 0.11 | 0.11 | 0.01 | 611.25 | 0.1  | 0.1  | 0.01 | 0.05 |
| fpps   | 14 | 0.91 | 0.9  | 0.02 | 190.6   | 2 | 0.85 | 0.85 | 0.03 | 85.28  | 0.76 | 0.76 | 0.04 | 0.04 |
| gcr    | 15 | 0.48 | 0.47 | 0.04 | 321.36  | 1 | 0.29 | 0.29 | 0.04 | 142.67 | 0.29 | 0.29 | 0.04 | 0.12 |
| glcm   | 19 | 0.84 | 0.83 | 0.04 | 59.15   | 2 | 0.6  | 0.61 | 0.07 | 44.55  | 0.49 | 0.48 | 0.07 | 0.24 |
| gria2  | 20 | 0.7  | 0.7  | 0.04 | 318.94  | 2 | 0.61 | 0.61 | 0.04 | 115.11 | 0.59 | 0.59 | 0.04 | 0.48 |
| grik1  | 6  | 0.84 | 0.84 | 0.03 | 107.8   | 2 | 0.56 | 0.55 | 0.06 | 68.70  | 0.55 | 0.55 | 0.05 | 0.32 |
| hdac2  | 14 | 0.74 | 0.74 | 0.03 | 240.08  | 3 | 0.52 | 0.52 | 0.04 | 104.52 | 0.45 | 0.45 | 0.04 | 0.37 |
| hdac8  | 15 | 0.9  | 0.9  | 0.02 | 204.11  | 6 | 0.71 | 0.71 | 0.03 | 105.28 | 0.52 | 0.52 | 0.04 | 0.59 |
| hivint | 13 | 0.32 | 0.31 | 0.06 | 136.17  | 3 | 0.13 | 0.13 | 0.04 | 69.74  | 0.1  | 0.1  | 0.04 | 0.02 |
| hivpr  | 12 | 0.3  | 0.3  | 0.02 | 1025.82 | 4 | 0.21 | 0.21 | 0.02 | 378.06 | 0.29 | 0.29 | 0.02 | 0.02 |
| hivrt  | 18 | 0.43 | 0.43 | 0.03 | 554.53  | 3 | 0.2  | 0.2  | 0.03 | 207.14 | 0.18 | 0.18 | 0.03 | 0.21 |
| hmdh   | 14 | 0.83 | 0.83 | 0.02 | 169.42  | 2 | 0.62 | 0.62 | 0.04 | 89.82  | 0.48 | 0.48 | 0.05 | 0.11 |
| hs90a  | 19 | 0.77 | 0.77 | 0.04 | 87.98   | 6 | 0.49 | 0.48 | 0.07 | 53.58  | 0.27 | 0.27 | 0.05 | 0.42 |
| hxx4   | 11 | 0.74 | 0.74 | 0.05 | 75.37   | 2 | 0.58 | 0.57 | 0.06 | 53.26  | 0.34 | 0.35 | 0.07 | 0.51 |
| igf1r  | 20 | 0.54 | 0.54 | 0.05 | 209.16  | 3 | 0.38 | 0.38 | 0.05 | 103.68 | 0.34 | 0.34 | 0.05 | 0.23 |
| inha   | 18 | 0.7  | 0.69 | 0.07 | 33.37   | 1 | 0.45 | 0.44 | 0.1  | 30.51  | 0.45 | 0.44 | 0.1  | 0.19 |
| ital   | 7  | 0.46 | 0.46 | 0.05 | 161.09  | 3 | 0.39 | 0.39 | 0.05 | 90.02  | 0.28 | 0.28 | 0.05 | 0.06 |

|       |    |      |      |      |         |   |      |      |      |        |      |      |      |      |
|-------|----|------|------|------|---------|---|------|------|------|--------|------|------|------|------|
| jak2  | 14 | 0.8  | 0.8  | 0.04 | 117.05  | 3 | 0.56 | 0.56 | 0.05 | 68.63  | 0.51 | 0.51 | 0.06 | 0.37 |
| kif11 | 15 | 0.84 | 0.83 | 0.03 | 130.06  | 4 | 0.79 | 0.79 | 0.03 | 77.14  | 0.77 | 0.77 | 0.04 | 0.05 |
| kit   | 9  | 0.38 | 0.38 | 0.04 | 185.31  | 5 | 0.15 | 0.15 | 0.04 | 105.55 | 0.17 | 0.17 | 0.04 | 0.08 |
| kith  | 14 | 0.96 | 0.96 | 0.01 | 40.43   | 2 | 0.89 | 0.89 | 0.03 | 35.29  | 0.88 | 0.88 | 0.03 | 0.62 |
| kpcb  | 11 | 0.74 | 0.74 | 0.04 | 168.56  | 1 | 0.62 | 0.62 | 0.04 | 92.39  | 0.62 | 0.62 | 0.05 | 0.52 |
| lck   | 10 | 0.61 | 0.61 | 0.02 | 993.33  | 2 | 0.34 | 0.34 | 0.03 | 314.28 | 0.31 | 0.31 | 0.03 | 0.31 |
| lkha4 | 17 | 0.59 | 0.59 | 0.05 | 160.92  | 3 | 0.47 | 0.47 | 0.05 | 79.46  | 0.43 | 0.43 | 0.05 | 0.17 |
| mapk2 | 21 | 0.92 | 0.91 | 0.02 | 134.9   | 5 | 0.79 | 0.79 | 0.03 | 65.26  | 0.7  | 0.7  | 0.04 | 0.64 |
| mcr   | 18 | 0.52 | 0.52 | 0.08 | 50.35   | 3 | 0.27 | 0.27 | 0.08 | 48.13  | 0.25 | 0.25 | 0.08 | 0.12 |
| met   | 10 | 0.67 | 0.67 | 0.04 | 215.84  | 4 | 0.5  | 0.5  | 0.05 | 118.48 | 0.61 | 0.61 | 0.04 | 0.13 |
| mk01  | 19 | 0.63 | 0.62 | 0.06 | 126.09  | 3 | 0.5  | 0.49 | 0.07 | 50.39  | 0.34 | 0.34 | 0.06 | 0.26 |
| mk10  | 19 | 0.56 | 0.55 | 0.05 | 90.35   | 5 | 0.41 | 0.41 | 0.06 | 71.09  | 0.31 | 0.31 | 0.06 | 0.23 |
| mk14  | 14 | 0.41 | 0.41 | 0.02 | 1329.56 | 5 | 0.23 | 0.23 | 0.02 | 442.60 | 0.35 | 0.35 | 0.02 | 0.06 |
| mmp13 | 8  | 0.68 | 0.68 | 0.02 | 1020.82 | 1 | 0.34 | 0.34 | 0.02 | 414.15 | 0.59 | 0.6  | 0.02 | 0.11 |
| mp2k1 | 20 | 0.4  | 0.39 | 0.05 | 158.97  | 3 | 0.18 | 0.18 | 0.04 | 83.43  | 0.12 | 0.12 | 0.04 | 0.16 |
| nos1  | 13 | 0.68 | 0.68 | 0.04 | 142.88  | 6 | 0.43 | 0.43 | 0.05 | 84.22  | 0.5  | 0.5  | 0.05 | 0.39 |
| nram  | 16 | 0.95 | 0.95 | 0.01 | 119.16  | 3 | 0.73 | 0.73 | 0.04 | 66.72  | 0.47 | 0.47 | 0.05 | 0.24 |
| pa2ga | 15 | 0.73 | 0.72 | 0.05 | 83.15   | 2 | 0.56 | 0.55 | 0.06 | 57.22  | 0.45 | 0.45 | 0.06 | 0.04 |
| parp1 | 17 | 0.9  | 0.9  | 0.01 | 812.95  | 2 | 0.76 | 0.76 | 0.02 | 356.11 | 0.71 | 0.71 | 0.02 | 0.7  |
| pde5a | 13 | 0.56 | 0.56 | 0.03 | 1007.22 | 2 | 0.48 | 0.48 | 0.03 | 297.26 | 0.47 | 0.47 | 0.03 | 0.29 |
| pgh1  | 12 | 0.4  | 0.4  | 0.05 | 149.71  | 4 | 0.23 | 0.23 | 0.04 | 107.03 | 0.2  | 0.2  | 0.04 | 0.06 |
| pgh2  | 15 | 0.63 | 0.63 | 0.03 | 687.72  | 7 | 0.4  | 0.4  | 0.03 | 233.66 | 0.33 | 0.33 | 0.03 | 0.32 |
| plk1  | 20 | 0.7  | 0.7  | 0.04 | 126.04  | 3 | 0.56 | 0.56 | 0.05 | 70.85  | 0.49 | 0.49 | 0.05 | 0.31 |
| pnph  | 23 | 0.9  | 0.9  | 0.02 | 135.09  | 2 | 0.78 | 0.77 | 0.04 | 76.44  | 0.76 | 0.75 | 0.04 | 0.74 |
| ppara | 10 | 0.41 | 0.42 | 0.03 | 369.56  | 4 | 0.23 | 0.23 | 0.03 | 191.24 | 0.14 | 0.14 | 0.02 | 0.07 |
| ppard | 8  | 0.46 | 0.46 | 0.04 | 231.32  | 1 | 0.28 | 0.28 | 0.04 | 117.60 | 0.28 | 0.28 | 0.03 | 0    |
| pparg | 14 | 0.46 | 0.46 | 0.03 | 922.63  | 1 | 0.22 | 0.22 | 0.03 | 274.90 | 0.22 | 0.22 | 0.03 | 0.07 |
| prgr  | 21 | 0.75 | 0.75 | 0.03 | 416.19  | 8 | 0.39 | 0.39 | 0.04 | 154.05 | 0.38 | 0.38 | 0.04 | 0.54 |
| ptn1  | 14 | 0.7  | 0.7  | 0.04 | 123.23  | 3 | 0.56 | 0.56 | 0.05 | 82.72  | 0.49 | 0.49 | 0.05 | 0.18 |
| pur2  | 16 | 0.97 | 0.97 | 0.01 | 38.66   | 2 | 0.84 | 0.83 | 0.04 | 33.99  | 0.85 | 0.85 | 0.04 | 0.05 |
| pygm  | 9  | 0.55 | 0.55 | 0.07 | 57.72   | 3 | 0.24 | 0.24 | 0.07 | 44.94  | 0.22 | 0.23 | 0.06 | 0.01 |
| pyrd  | 20 | 0.81 | 0.81 | 0.03 | 107.26  | 6 | 0.56 | 0.56 | 0.05 | 70.84  | 0.61 | 0.61 | 0.05 | 0.22 |

|       |       |      |      |      |        |      |      |      |      |        |      |      |      |      |
|-------|-------|------|------|------|--------|------|------|------|------|--------|------|------|------|------|
| reni  | 7     | 0.66 | 0.66 | 0.04 | 143.7  | 3    | 0.48 | 0.48 | 0.06 | 74.09  | 0.38 | 0.37 | 0.06 | 0.23 |
| rock1 | 14    | 0.68 | 0.68 | 0.05 | 100.06 | 3    | 0.4  | 0.39 | 0.06 | 67.75  | 0.29 | 0.29 | 0.05 | 0.34 |
| rxra  | 12    | 0.95 | 0.95 | 0.01 | 95.02  | 2    | 0.71 | 0.71 | 0.04 | 67.62  | 0.65 | 0.65 | 0.05 | 0.62 |
| sahh  | 18    | 0.98 | 0.98 | 0.01 | 36.9   | 3    | 0.91 | 0.91 | 0.03 | 35.39  | 0.92 | 0.92 | 0.02 | 0.77 |
| src   | 10    | 0.53 | 0.53 | 0.02 | 889.05 | 3    | 0.32 | 0.32 | 0.02 | 421.45 | 0.26 | 0.26 | 0.02 | 0.18 |
| tgfr1 | 17    | 0.85 | 0.84 | 0.03 | 182.29 | 5    | 0.67 | 0.67 | 0.04 | 87.56  | 0.58 | 0.57 | 0.05 | 0.45 |
| thb   | 15    | 0.81 | 0.81 | 0.03 | 104.52 | 2    | 0.69 | 0.69 | 0.05 | 68.33  | 0.6  | 0.6  | 0.06 | 0.4  |
| thrb  | 9     | 0.76 | 0.76 | 0.02 | 946.82 | 3    | 0.59 | 0.59 | 0.02 | 310.40 | 0.49 | 0.49 | 0.03 | 0.12 |
| try1  | 11    | 0.91 | 0.91 | 0.01 | 695    | 2    | 0.87 | 0.87 | 0.01 | 269.52 | 0.83 | 0.83 | 0.02 | 0.12 |
| tryb1 | 13    | 0.79 | 0.79 | 0.03 | 140.13 | 1    | 0.54 | 0.54 | 0.05 | 81.62  | 0.54 | 0.54 | 0.05 | 0.13 |
| tysy  | 19    | 0.62 | 0.62 | 0.05 | 116.44 | 2    | 0.43 | 0.42 | 0.06 | 72.73  | 0.38 | 0.38 | 0.06 | 0.28 |
| urok  | 13    | 0.93 | 0.93 | 0.01 | 253.93 | 2    | 0.91 | 0.91 | 0.02 | 108.93 | 0.89 | 0.89 | 0.02 | 0.56 |
| vgfr2 | 13    | 0.48 | 0.48 | 0.03 | 708.5  | 1    | 0.32 | 0.32 | 0.03 | 238.85 | 0.33 | 0.33 | 0.03 | 0.13 |
| wee1  | 18    | 1    | 0.99 | 0    | 116.24 | 1    | 0.98 | 0.98 | 0.01 | 64.12  | 0.98 | 0.98 | 0.01 | 0.75 |
| xiap  | 14    | 0.96 | 0.96 | 0.01 | 74.34  | 2    | 0.87 | 0.87 | 0.03 | 57.44  | 0.87 | 0.87 | 0.03 | 0.52 |
| Mean  | 14.30 | 0.66 | 0.66 | 0.03 | 356.40 | 2.99 | 0.48 | 0.48 | 0.04 | 149.99 | 0.45 | 0.45 | 0.04 | 0.24 |

(a) Target identification on the DUD-E database (<http://dude.docking.org/>)

(b) Number of aggregated scoring functions

(c) BEDROC of the best performing VS strategy

(d) Mean BEDROC on 1000 bootstrap simulations of the best performing VS strategy

(e) Standard deviation of the bootstrap cross-validation procedure

(f) Run time for each consensus scoring approach

Table TS3. VS performance of different scoring methods for the DUD-E database when EF at the first 1% of screened data is used as model selection criterion

| Target <sup>(a)</sup> | Opt. EF <sup>(b)</sup> | CompScore           |                   |                         |                              |                               |                               | Exhaustive Search   |                   |                         |                              |                               |                               | Best Individual Scoring Component |                         |                              |                               | All Scoring Components |                               |
|-----------------------|------------------------|---------------------|-------------------|-------------------------|------------------------------|-------------------------------|-------------------------------|---------------------|-------------------|-------------------------|------------------------------|-------------------------------|-------------------------------|-----------------------------------|-------------------------|------------------------------|-------------------------------|------------------------|-------------------------------|
|                       |                        | Size <sup>(c)</sup> | EF <sup>(d)</sup> | Boot. EF <sup>(e)</sup> | Std. Boot. EF <sup>(f)</sup> | Fract. Opt. EF <sup>(g)</sup> | Time (seconds) <sup>(h)</sup> | Size <sup>(c)</sup> | EF <sup>(d)</sup> | Boot. EF <sup>(e)</sup> | Std. Boot. EF <sup>(f)</sup> | Fract. Opt. EF <sup>(g)</sup> | Time (seconds) <sup>(h)</sup> | EF <sup>(d)</sup>                 | Boot. EF <sup>(e)</sup> | Std. Boot. EF <sup>(f)</sup> | Fract. Opt. EF <sup>(g)</sup> | EF <sup>(d)</sup>      | Fract. Opt. EF <sup>(g)</sup> |
| aa2ar                 | 66.17                  | 20                  | 46.19             | 45.8                    | 1.63                         | 0.69                          | 951.53                        | 1                   | 33.08             | 33.14                   | 1.71                         | 0.50                          | 354.85                        | 33.71                             | 33.89                   | 1.67                         | 0.51                          | 24.14                  | 0.36                          |
| abl1                  | 59.61                  | 14                  | 35.33             | 34.37                   | 3.05                         | 0.58                          | 214.87                        | 1                   | 22.08             | 21.74                   | 2.72                         | 0.37                          | 110.86                        | 25.39                             | 24.98                   | 2.51                         | 0.43                          | 10.49                  | 0.18                          |
| ace                   | 60.77                  | 14                  | 29.5              | 28.97                   | 2.26                         | 0.48                          | 418.39                        | 2                   | 17.06             | 17.19                   | 2.02                         | 0.28                          | 177.24                        | 15.99                             | 16.17                   | 2.05                         | 0.26                          | 2.13                   | 0.04                          |
| aces                  | 51.64                  | 13                  | 32.25             | 31.96                   | 1.83                         | 0.62                          | 570.06                        | 3                   | 25.71             | 25.8                    | 1.65                         | 0.50                          | 243.67                        | 20.52                             | 20.31                   | 1.59                         | 0.40                          | 6.09                   | 0.12                          |
| ada                   | 59.35                  | 21                  | 45.58             | 43.08                   | 3.75                         | 0.73                          | 114.91                        | 2                   | 32.86             | 32.44                   | 4.36                         | 0.55                          | 60.43                         | 19.08                             | 18.68                   | 3.45                         | 0.32                          | 5.3                    | 0.09                          |
| ada17                 | 68.15                  | 8                   | 51.06             | 50.82                   | 1.63                         | 0.75                          | 937.72                        | 1                   | 37.92             | 37.75                   | 1.74                         | 0.56                          | 415.39                        | 46                                | 45.67                   | 1.5                          | 0.67                          | 19.15                  | 0.28                          |
| adrb1                 | 62.23                  | 14                  | 26.27             | 25.91                   | 2.33                         | 0.42                          | 392.3                         | 3                   | 14.95             | 14.63                   | 2.07                         | 0.24                          | 164.80                        | 9.29                              | 9.18                    | 1.67                         | 0.15                          | 8.08                   | 0.13                          |
| adrb2                 | 58.77                  | 18                  | 23.94             | 23.28                   | 2.42                         | 0.40                          | 329.11                        | 4                   | 10.88             | 10.48                   | 1.83                         | 0.19                          | 141.97                        | 11.75                             | 11.49                   | 1.93                         | 0.20                          | 7.84                   | 0.13                          |
| akt1                  | 56.53                  | 14                  | 37.57             | 37.51                   | 2.23                         | 0.66                          | 413.34                        | 2                   | 26.89             | 26.81                   | 2.11                         | 0.48                          | 167.90                        | 23.44                             | 23.28                   | 2.07                         | 0.41                          | 12.41                  | 0.22                          |
| akt2                  | 59.36                  | 17                  | 36.13             | 34.9                    | 3.55                         | 0.59                          | 136.22                        | 4                   | 24.95             | 24.66                   | 3.3                          | 0.42                          | 71.50                         | 23.23                             | 23.06                   | 3.73                         | 0.39                          | 10.32                  | 0.17                          |
| aldr                  | 57.13                  | 18                  | 32.02             | 30.75                   | 2.97                         | 0.54                          | 201.36                        | 1                   | 27                | 27.72                   | 2.93                         | 0.47                          | 90.45                         | 27                                | 27.56                   | 2.92                         | 0.47                          | 2.51                   | 0.04                          |
| ampc                  | 59.94                  | 14                  | 39.27             | 37.13                   | 5.5                          | 0.62                          | 45.26                         | 2                   | 10.33             | 10.74                   | 4.25                         | 0.17                          | 35.09                         | 8.27                              | 7.59                    | 3.7                          | 0.14                          | 0                      | 0.00                          |
| andr                  | 59.84                  | 12                  | 30.14             | 29.57                   | 2.52                         | 0.49                          | 288.34                        | 5                   | 17.1              | 16.38                   | 2.36                         | 0.29                          | 136.56                        | 13.05                             | 13.33                   | 2.22                         | 0.22                          | 9.9                    | 0.17                          |
| aofb                  | 57.55                  | 20                  | 21.69             | 20.61                   | 3.09                         | 0.36                          | 147.9                         | 6                   | 16.68             | 16.11                   | 3.05                         | 0.29                          | 72.20                         | 11.68                             | 10.85                   | 2.73                         | 0.20                          | 4.17                   | 0.07                          |
| bace1                 | 65.61                  | 15                  | 17.47             | 16.95                   | 2.05                         | 0.26                          | 508.84                        | 1                   | 11.41             | 11.5                    | 1.93                         | 0.17                          | 183.25                        | 11.77                             | 11.7                    | 1.88                         | 0.18                          | 8.56                   | 0.13                          |
| braf                  | 66.15                  | 11                  | 36.68             | 36.27                   | 3.16                         | 0.55                          | 231.19                        | 3                   | 17.68             | 17.37                   | 2.81                         | 0.27                          | 101.97                        | 19.65                             | 19.64                   | 2.8                          | 0.30                          | 11.79                  | 0.18                          |
| cah2                  | 64.1                   | 23                  | 31.74             | 31.51                   | 1.71                         | 0.49                          | 1024.17                       | 6                   | 13.23             | 12.79                   | 1.39                         | 0.21                          | 362.64                        | 12.41                             | 12.12                   | 1.4                          | 0.19                          | 4.68                   | 0.07                          |
| casp3                 | 54.64                  | 16                  | 17.54             | 17.06                   | 2.32                         | 0.31                          | 272.26                        | 2                   | 12.03             | 11.93                   | 1.99                         | 0.22                          | 116.46                        | 10.03                             | 9.87                    | 1.91                         | 0.18                          | 1.5                    | 0.03                          |
| cdk2                  | 59.56                  | 21                  | 27.36             | 26.92                   | 1.69                         | 0.45                          | 807.19                        | 5                   | 20.2              | 19.86                   | 1.55                         | 0.34                          | 297.64                        | 17.05                             | 16.87                   | 1.43                         | 0.29                          | 13.47                  | 0.23                          |
| comt                  | 94.27                  | 21                  | 91.85             | 90.34                   | 3.13                         | 0.96                          | 79.93                         | 1                   | 79.77             | 78.43                   | 4.86                         | 0.85                          | 45.32                         | 79.77                             | 78.64                   | 4.88                         | 0.85                          | 36.26                  | 0.38                          |
| cp2c9                 | 61.89                  | 25                  | 15.05             | 14.09                   | 2.91                         | 0.23                          | 165.67                        | 4                   | 8.36              | 8.07                    | 2.35                         | 0.14                          | 75.81                         | 5.85                              | 5.3                     | 2.01                         | 0.09                          | 3.35                   | 0.05                          |
| cp3a4                 | 70.18                  | 17                  | 14.04             | 13.94                   | 2.5                          | 0.20                          | 294.07                        | 4                   | 11.11             | 10.47                   | 2.27                         | 0.16                          | 118.99                        | 10.53                             | 10.24                   | 2.24                         | 0.15                          | 4.68                   | 0.07                          |
| csf1r                 | 73.81                  | 17                  | 33.01             | 32.17                   | 3.09                         | 0.44                          | 303.65                        | 1                   | 24                | 23.63                   | 2.93                         | 0.33                          | 120.77                        | 24                                | 23.68                   | 2.9                          | 0.33                          | 7.2                    | 0.10                          |

|        |       |    |       |       |      |      |         |   |       |       |      |      |        |       |       |      |      |       |      |
|--------|-------|----|-------|-------|------|------|---------|---|-------|-------|------|------|--------|-------|-------|------|------|-------|------|
| cxcr4  | 86.02 | 19 | 51.61 | 50.37 | 6.83 | 0.59 | 62.36   | 4 | 29.49 | 26.35 | 6.35 | 0.34 | 40.66  | 19.66 | 19.68 | 6.03 | 0.23 | 12.29 | 0.14 |
| def    | 58.46 | 17 | 58.46 | 56.89 | 2.27 | 0.97 | 122.1   | 1 | 35.28 | 35.79 | 4    | 0.60 | 62.90  | 42.34 | 42.17 | 3.47 | 0.72 | 8.06  | 0.14 |
| dhi1   | 58.9  | 14 | 19.94 | 19.51 | 1.88 | 0.33 | 452.78  | 3 | 11.78 | 11.7  | 1.74 | 0.20 | 212.26 | 8.76  | 8.84  | 1.5  | 0.15 | 2.42  | 0.04 |
| dpp4   | 77.65 | 13 | 42.95 | 42.56 | 1.76 | 0.55 | 1172.21 | 2 | 34.13 | 34.17 | 1.81 | 0.44 | 478.41 | 33.38 | 33.44 | 1.74 | 0.43 | 13.5  | 0.17 |
| drd3   | 70.5  | 19 | 26.41 | 26.09 | 1.8  | 0.37 | 964.27  | 5 | 14.97 | 14.66 | 1.52 | 0.21 | 358.36 | 9.77  | 10.11 | 1.3  | 0.14 | 3.33  | 0.05 |
| dyr    | 75.66 | 20 | 52.18 | 51.67 | 2.86 | 0.68 | 462.34  | 2 | 40.01 | 39.61 | 2.82 | 0.53 | 171.22 | 39.14 | 39.26 | 2.68 | 0.52 | 26.96 | 0.36 |
| egfr   | 65.57 | 10 | 49.32 | 48.83 | 1.54 | 0.74 | 971.57  | 5 | 28.45 | 28.59 | 1.61 | 0.43 | 415.57 | 22.72 | 22.82 | 2.3  | 0.35 | 20.32 | 0.31 |
| esr1   | 54.86 | 17 | 43.26 | 42.5  | 1.61 | 0.77 | 502.85  | 1 | 36.4  | 36.4  | 2.11 | 0.66 | 215.12 | 34.29 | 33.97 | 2.14 | 0.63 | 6.07  | 0.11 |
| esr2   | 55.88 | 11 | 41.71 | 41.64 | 1.84 | 0.75 | 472.16  | 3 | 32.17 | 32.27 | 2.12 | 0.58 | 214.72 | 29.99 | 30.2  | 1.98 | 0.54 | 8.45  | 0.15 |
| fa10   | 53.51 | 14 | 39.34 | 38.95 | 1.68 | 0.73 | 786.81  | 3 | 31.32 | 31.3  | 1.53 | 0.59 | 294.69 | 28.71 | 28.61 | 1.46 | 0.54 | 5.03  | 0.09 |
| fa7    | 55.5  | 17 | 55.5  | 55.47 | 0.25 | 1.00 | 130     | 1 | 55.5  | 54.97 | 1.12 | 1.00 | 68.47  | 55.5  | 55.02 | 1.04 | 1.00 | 11.27 | 0.20 |
| fabp4  | 58.09 | 15 | 41.49 | 39.04 | 5.16 | 0.67 | 43.86   | 1 | 39.41 | 37.43 | 5.56 | 0.68 | 35.16  | 39.41 | 37.53 | 5.57 | 0.68 | 6.22  | 0.11 |
| fak1   | 54.7  | 7  | 36.8  | 35.92 | 4.02 | 0.66 | 86.09   | 6 | 26.85 | 25.54 | 3.64 | 0.49 | 60.03  | 23.87 | 22.67 | 3.65 | 0.44 | 12.93 | 0.24 |
| fgfr1  | 58.67 | 18 | 30.07 | 29.41 | 3.37 | 0.50 | 167.57  | 6 | 19.07 | 18.15 | 2.94 | 0.33 | 82.78  | 16.13 | 16.1  | 2.81 | 0.27 | 11    | 0.19 |
| fkbl1a | 53.19 | 23 | 38.12 | 37.3  | 3.4  | 0.70 | 131.49  | 8 | 21.28 | 20.04 | 3.24 | 0.40 | 63.65  | 17.73 | 17.12 | 3.11 | 0.33 | 7.09  | 0.13 |
| fnta   | 87.58 | 18 | 15.86 | 15.53 | 1.38 | 0.18 | 1528.55 | 3 | 7.93  | 7.8   | 1.05 | 0.09 | 583.78 | 7.09  | 7.21  | 1.05 | 0.08 | 4.05  | 0.05 |
| fpps   | 97.77 | 14 | 81.47 | 80.23 | 3.73 | 0.82 | 184.69  | 2 | 72.7  | 72.4  | 4.73 | 0.74 | 86.18  | 66.43 | 66.5  | 4.56 | 0.68 | 1.25  | 0.01 |
| gcr    | 69.67 | 20 | 27.09 | 26.77 | 2.68 | 0.38 | 324.83  | 1 | 17.42 | 17.65 | 2.39 | 0.25 | 138.15 | 17.42 | 17.6  | 2.52 | 0.25 | 7.74  | 0.11 |
| glcm   | 70.24 | 19 | 61    | 58.32 | 4.15 | 0.83 | 67.52   | 3 | 36.97 | 36.23 | 5.27 | 0.53 | 44.52  | 35.12 | 33.2  | 5.63 | 0.50 | 16.64 | 0.24 |
| gria2  | 75.45 | 25 | 46.92 | 46.45 | 3.64 | 0.62 | 298.11  | 3 | 38.67 | 37.8  | 3.42 | 0.51 | 122.71 | 36.14 | 36.11 | 3.64 | 0.48 | 29.16 | 0.39 |
| grik1  | 65.78 | 13 | 56.81 | 56.38 | 2.7  | 0.86 | 146.64  | 1 | 30.9  | 31.25 | 4.18 | 0.47 | 71.32  | 30.9  | 31.64 | 4.25 | 0.47 | 16.94 | 0.26 |
| hdac2  | 57.73 | 21 | 42.19 | 41.52 | 2.81 | 0.72 | 240     | 5 | 29.42 | 29.04 | 2.6  | 0.51 | 103.94 | 28.87 | 28.68 | 2.82 | 0.50 | 21.09 | 0.37 |
| hdac8  | 63.06 | 12 | 63.06 | 62.26 | 1.28 | 0.99 | 208.54  | 6 | 45.21 | 43.92 | 3.01 | 0.72 | 111.70 | 32.72 | 32    | 2.88 | 0.52 | 36.88 | 0.58 |
| hivint | 67.98 | 18 | 16.99 | 16.36 | 3.46 | 0.24 | 151.65  | 3 | 9     | 8.64  | 2.82 | 0.13 | 70.73  | 6     | 6.03  | 2.36 | 0.09 | 1     | 0.01 |
| hivpr  | 67.72 | 11 | 18.2  | 17.92 | 1.51 | 0.26 | 1043.03 | 4 | 12.76 | 12.67 | 1.37 | 0.19 | 396.82 | 17.26 | 17.09 | 1.46 | 0.25 | 0.75  | 0.01 |
| hivrt  | 55.77 | 19 | 21.77 | 21.25 | 1.87 | 0.38 | 469.98  | 3 | 10.44 | 10.36 | 1.55 | 0.19 | 185.00 | 9.25  | 9.34  | 1.51 | 0.17 | 10.44 | 0.19 |
| hmdh   | 52.33 | 16 | 46.45 | 45.27 | 2.32 | 0.87 | 208.51  | 2 | 31.16 | 30.52 | 2.64 | 0.60 | 93.81  | 25.87 | 25.18 | 2.66 | 0.49 | 4.12  | 0.08 |
| hs90a  | 62.82 | 16 | 47.44 | 46.23 | 4.61 | 0.74 | 96.63   | 7 | 30.77 | 29.27 | 4.35 | 0.49 | 55.57  | 16.67 | 18.08 | 3.93 | 0.27 | 26.92 | 0.43 |
| hxx4   | 48.66 | 21 | 36.77 | 35.84 | 3.96 | 0.74 | 81.76   | 2 | 25.95 | 26.89 | 3.99 | 0.53 | 50.75  | 16.22 | 15.11 | 3.23 | 0.33 | 21.63 | 0.44 |
| igf1r  | 63.61 | 25 | 32.14 | 30.98 | 3.11 | 0.49 | 236.86  | 3 | 19.42 | 19.24 | 2.94 | 0.31 | 94.26  | 18.75 | 17.89 | 2.75 | 0.29 | 10.71 | 0.17 |
| inha   | 53.11 | 19 | 42.05 | 39.51 | 5.07 | 0.74 | 43.59   | 1 | 19.92 | 20.05 | 5.94 | 0.38 | 32.27  | 19.92 | 19.64 | 5.83 | 0.38 | 8.85  | 0.17 |
| ital   | 62.3  | 13 | 24.63 | 24.33 | 3.42 | 0.39 | 166.16  | 2 | 21.01 | 20.41 | 3.23 | 0.34 | 93.50  | 15.21 | 15.33 | 2.84 | 0.24 | 3.62  | 0.06 |

|       |       |    |       |       |      |      |         |   |       |       |      |      |        |       |       |      |      |       |      |
|-------|-------|----|-------|-------|------|------|---------|---|-------|-------|------|------|--------|-------|-------|------|------|-------|------|
| jak2  | 61.28 | 20 | 47.35 | 46.61 | 3.25 | 0.76 | 136.95  | 3 | 31.57 | 31.12 | 3.63 | 0.52 | 70.15  | 26    | 25.99 | 3.78 | 0.42 | 18.57 | 0.30 |
| kif11 | 59.9  | 19 | 51.34 | 50.32 | 3.23 | 0.84 | 145.57  | 4 | 48.77 | 47.95 | 2.84 | 0.81 | 71.95  | 44.49 | 44.84 | 3.29 | 0.74 | 3.42  | 0.06 |
| kit   | 63.67 | 12 | 23.43 | 22.79 | 2.96 | 0.36 | 218.1   | 4 | 8.41  | 7.92  | 2.04 | 0.13 | 107.33 | 9.61  | 9.55  | 2.17 | 0.15 | 4.2   | 0.07 |
| kith  | 50.91 | 34 | 50.91 | 50.35 | 1.53 | 0.99 | 64.06   | 1 | 50.91 | 49.49 | 2.59 | 1.00 | 36.73  | 50.91 | 49.39 | 2.75 | 1.00 | 28.85 | 0.57 |
| kpcb  | 65.99 | 20 | 47.24 | 46.15 | 3.37 | 0.70 | 193.44  | 1 | 34.5  | 34.36 | 3.83 | 0.52 | 89.69  | 34.5  | 34.56 | 3.61 | 0.52 | 30.75 | 0.47 |
| lck   | 66.11 | 16 | 36.99 | 36.64 | 1.86 | 0.55 | 789.45  | 2 | 19.81 | 19.69 | 1.81 | 0.30 | 298.70 | 17.66 | 17.81 | 1.66 | 0.27 | 16.94 | 0.26 |
| lkha4 | 45.6  | 16 | 28.43 | 27.43 | 2.42 | 0.60 | 164.68  | 3 | 21.32 | 20.97 | 2.48 | 0.47 | 82.32  | 17.77 | 18.45 | 2.57 | 0.39 | 10.07 | 0.22 |
| mapk2 | 62.12 | 24 | 61.13 | 59.57 | 2.23 | 0.96 | 141.52  | 4 | 49.3  | 49.04 | 3.32 | 0.79 | 66.43  | 41.41 | 40.83 | 3.96 | 0.67 | 35.5  | 0.57 |
| mcr   | 82.51 | 19 | 34.54 | 34.13 | 6.01 | 0.41 | 71.77   | 2 | 15.35 | 15.19 | 4.87 | 0.19 | 48.13  | 15.35 | 15.57 | 5.09 | 0.19 | 9.59  | 0.12 |
| met   | 68.51 | 9  | 43.27 | 42.91 | 3.25 | 0.63 | 249.09  | 4 | 30.65 | 29.97 | 3.13 | 0.45 | 115.02 | 34.86 | 35.23 | 3.56 | 0.51 | 7.81  | 0.11 |
| mk01  | 57.71 | 22 | 32.62 | 31.68 | 4.54 | 0.55 | 98.94   | 3 | 25.09 | 25.31 | 4.43 | 0.43 | 51.26  | 21.33 | 20.12 | 3.92 | 0.37 | 11.29 | 0.20 |
| mk10  | 64.21 | 19 | 36.42 | 35.25 | 4.05 | 0.55 | 145     | 4 | 23.96 | 23.28 | 3.62 | 0.37 | 69.18  | 17.25 | 17.22 | 3.37 | 0.27 | 14.38 | 0.22 |
| mk14  | 62.79 | 9  | 23.87 | 23.72 | 1.57 | 0.38 | 950.81  | 3 | 11.94 | 11.83 | 1.28 | 0.19 | 387.82 | 17.99 | 18.01 | 1.45 | 0.29 | 4.15  | 0.07 |
| mmp13 | 65.73 | 17 | 38.29 | 37.79 | 1.72 | 0.57 | 1176.44 | 1 | 18.01 | 18.07 | 1.47 | 0.27 | 438.33 | 39.86 | 39.68 | 1.81 | 0.61 | 6.99  | 0.11 |
| mp2k1 | 68.14 | 20 | 23.27 | 22.68 | 3.58 | 0.33 | 155.07  | 3 | 11.63 | 11.21 | 2.7  | 0.17 | 84.62  | 6.65  | 6.6   | 2.31 | 0.10 | 9.14  | 0.13 |
| nos1  | 81.82 | 20 | 44.44 | 43.39 | 4.51 | 0.53 | 159.34  | 4 | 30.3  | 29.54 | 4.28 | 0.37 | 85.36  | 34.34 | 34.09 | 4.47 | 0.42 | 24.24 | 0.30 |
| nram  | 64.07 | 16 | 64.07 | 63.01 | 1.75 | 0.98 | 136.21  | 2 | 45.77 | 45.04 | 3.52 | 0.71 | 65.71  | 27.46 | 27.84 | 3.88 | 0.43 | 14.24 | 0.22 |
| pa2ga | 52.91 | 17 | 40.93 | 39.37 | 3.68 | 0.74 | 103.74  | 2 | 25.96 | 26.07 | 3.68 | 0.49 | 56.60  | 22.96 | 22.75 | 3.47 | 0.43 | 2     | 0.04 |
| parp1 | 60.03 | 26 | 58.26 | 57.94 | 0.8  | 0.97 | 971.19  | 2 | 45.86 | 45.64 | 1.36 | 0.76 | 339.21 | 40.54 | 40.51 | 1.56 | 0.68 | 39.95 | 0.67 |
| pde5a | 69.94 | 20 | 34.09 | 33.74 | 2.06 | 0.48 | 824.73  | 2 | 27.32 | 27.62 | 1.98 | 0.39 | 292.93 | 27.32 | 27.38 | 1.97 | 0.39 | 15.79 | 0.23 |
| pgh1  | 57.04 | 12 | 20.1  | 19.21 | 2.58 | 0.34 | 182.59  | 4 | 13.04 | 12.69 | 2.19 | 0.23 | 111.23 | 10.32 | 10.34 | 2.13 | 0.18 | 2.17  | 0.04 |
| pgh2  | 52.47 | 11 | 32.26 | 32.37 | 1.93 | 0.62 | 519.3   | 5 | 19.26 | 18.94 | 1.64 | 0.37 | 211.94 | 15.89 | 15.85 | 1.62 | 0.30 | 15.16 | 0.29 |
| plk1  | 64.84 | 23 | 42.29 | 40.71 | 3.62 | 0.63 | 152.91  | 3 | 35.71 | 35.38 | 3.85 | 0.55 | 74.55  | 27.25 | 26.8  | 3.97 | 0.42 | 17.85 | 0.28 |
| pnph  | 68    | 27 | 65.13 | 63.32 | 2.74 | 0.93 | 142.01  | 2 | 51.72 | 51.23 | 4.12 | 0.76 | 72.89  | 48.85 | 47.96 | 4.13 | 0.72 | 45.01 | 0.66 |
| ppara | 48.87 | 9  | 19.6  | 19.6  | 1.76 | 0.40 | 428.92  | 3 | 11.55 | 11.63 | 1.51 | 0.24 | 190.85 | 6.44  | 6.38  | 1.2  | 0.13 | 3.76  | 0.08 |
| ppard | 50.17 | 6  | 23.22 | 23    | 2.25 | 0.46 | 241.61  | 1 | 12.44 | 12.78 | 1.98 | 0.25 | 121.94 | 12.44 | 12.79 | 1.97 | 0.25 | 0     | 0.00 |
| pparg | 53.06 | 20 | 22.39 | 22.13 | 1.61 | 0.42 | 777.48  | 1 | 10.78 | 10.74 | 1.21 | 0.20 | 249.12 | 10.78 | 10.71 | 1.29 | 0.20 | 3.32  | 0.06 |
| prgr  | 58.68 | 25 | 45.33 | 44.64 | 2.39 | 0.76 | 318.85  | 5 | 21.45 | 20.93 | 2.33 | 0.37 | 144.63 | 18.21 | 18.25 | 2.19 | 0.31 | 29.95 | 0.51 |
| ptn1  | 56.37 | 14 | 38.85 | 38.06 | 3.54 | 0.68 | 146.85  | 2 | 29.71 | 29.87 | 3.13 | 0.53 | 78.34  | 26.66 | 26.94 | 3.4  | 0.47 | 7.62  | 0.14 |
| pur2  | 54.66 | 22 | 54.66 | 53.97 | 1.89 | 0.99 | 53.85   | 1 | 48.8  | 47.4  | 3.48 | 0.89 | 34.15  | 50.76 | 48.59 | 3.62 | 0.93 | 1.95  | 0.04 |
| pygm  | 52    | 21 | 16.49 | 15.14 | 3.65 | 0.29 | 82.01   | 2 | 12.68 | 11.63 | 3.36 | 0.24 | 46.72  | 13.95 | 13.68 | 3.52 | 0.27 | 1.27  | 0.02 |
| pyrd  | 55.87 | 14 | 50.55 | 49    | 3.21 | 0.88 | 109.65  | 5 | 31.93 | 30.59 | 3.53 | 0.57 | 69.18  | 31.04 | 31.07 | 4.34 | 0.56 | 10.64 | 0.19 |

|       |       |       |       |       |      |      |        |      |       |       |      |      |        |       |       |      |      |       |      |
|-------|-------|-------|-------|-------|------|------|--------|------|-------|-------|------|------|--------|-------|-------|------|------|-------|------|
| reni  | 67.76 | 7     | 41.99 | 41.02 | 3.65 | 0.61 | 139.59 | 2    | 24.81 | 24.88 | 4.36 | 0.37 | 72.66  | 19.09 | 19.05 | 3.78 | 0.28 | 12.41 | 0.18 |
| rock1 | 63.74 | 26    | 40.83 | 39.75 | 4.13 | 0.62 | 122.19 | 5    | 25.89 | 24.96 | 3.53 | 0.41 | 68.16  | 15.94 | 15.95 | 3.18 | 0.25 | 19.92 | 0.31 |
| rxra  | 53.25 | 21    | 53.25 | 52.87 | 0.89 | 0.99 | 127.75 | 4    | 39.11 | 38.61 | 3.06 | 0.73 | 69.61  | 32.45 | 32.95 | 3.09 | 0.61 | 34.11 | 0.64 |
| sahh  | 48.02 | 28    | 48.02 | 47.98 | 0.33 | 1.00 | 56.47  | 2    | 48.02 | 46.06 | 2.83 | 1.00 | 36.47  | 46.36 | 45.74 | 2.78 | 0.97 | 38.08 | 0.79 |
| src   | 66.49 | 12    | 32.67 | 32.22 | 1.68 | 0.48 | 955.4  | 2    | 17.96 | 18.02 | 1.48 | 0.27 | 399.24 | 14.52 | 14.85 | 1.44 | 0.22 | 9.17  | 0.14 |
| tgfr1 | 64.23 | 18    | 56.76 | 55.32 | 2.92 | 0.86 | 176.39 | 2    | 39.58 | 39.06 | 3.06 | 0.62 | 89.37  | 34.35 | 33.74 | 3.21 | 0.53 | 24.64 | 0.38 |
| thb   | 66.72 | 24    | 53.38 | 51.4  | 3.76 | 0.77 | 135.8  | 2    | 42.09 | 41.42 | 4.41 | 0.63 | 68.22  | 32.85 | 33.81 | 4.05 | 0.49 | 22.58 | 0.34 |
| thrb  | 59.91 | 7     | 45.92 | 45.66 | 1.61 | 0.76 | 678.75 | 3    | 32.36 | 32.47 | 1.75 | 0.54 | 270.53 | 25.36 | 25.56 | 1.7  | 0.42 | 7.22  | 0.12 |
| try1  | 58.56 | 9     | 58.34 | 58.05 | 0.59 | 0.99 | 693.85 | 2    | 53.44 | 53.41 | 1.12 | 0.91 | 262.63 | 50.54 | 50.56 | 1.62 | 0.86 | 6.01  | 0.10 |
| tryb1 | 52.41 | 15    | 43.68 | 42.65 | 2.38 | 0.81 | 155.78 | 1    | 25.53 | 25.06 | 2.9  | 0.49 | 81.97  | 25.53 | 25.08 | 2.93 | 0.49 | 7.39  | 0.14 |
| tysy  | 62.61 | 20    | 35.39 | 34.42 | 3.93 | 0.55 | 156.22 | 4    | 25.41 | 24.3  | 3.41 | 0.41 | 74.01  | 19.96 | 20.03 | 3.58 | 0.32 | 14.52 | 0.23 |
| urok  | 61.56 | 20    | 60.94 | 59.56 | 2.04 | 0.97 | 256.66 | 2    | 60.94 | 60.85 | 0.9  | 0.99 | 104.03 | 57.86 | 57.35 | 2.02 | 0.94 | 32.01 | 0.52 |
| vgfr2 | 57.28 | 10    | 26.78 | 26.6  | 1.85 | 0.46 | 509.54 | 2    | 15.87 | 15.93 | 1.71 | 0.28 | 244.17 | 15.62 | 15.52 | 1.68 | 0.27 | 5.95  | 0.10 |
| wee1  | 61.16 | 24    | 61.16 | 61.16 | 0    | 1.00 | 137.18 | 1    | 61.16 | 61.15 | 0.12 | 1.00 | 65.02  | 61.16 | 61.1  | 0.32 | 1.00 | 46.6  | 0.76 |
| xiap  | 52.3  | 24    | 52.3  | 52.1  | 0.72 | 1.00 | 112.78 | 1    | 49.34 | 48.53 | 1.92 | 0.94 | 58.19  | 49.34 | 48.59 | 1.92 | 0.94 | 24.67 | 0.47 |
| Mean  | 62.24 | 17.26 | 39.64 | 38.85 | 2.68 | 0.63 | 346.47 | 2.83 | 28.12 | 27.73 | 2.78 | 0.46 | 147.08 | 25.71 | 25.53 | 2.76 | 0.42 | 13.16 | 0.21 |

(a) Target identification on the DUD-E database (<http://dude.docking.org/>)

(b) EF at 1% of screened data for a perfect ranking of the active compounds on the ranked list

(c) Number of aggregated scoring functions

(d) EF of the best performing VS strategy

(e) Mean EF on 1000 bootstrap simulations of the best performing VS strategy

(f) Standard deviation of the bootstrap cross-validation procedure

(g) Fraction of the maximum possible EF that the VS method achieves

(h) Run time for each consensus scoring approach

Table TS4. VS performance of different scoring methods for the DUD-E database when BEDROC with  $\alpha$  is set to 160.9 is used as model selection criterion and weighted scoring components are employed

| Target | CompScore |        |                 |                         |         | BISC   |                 |                         | ASC    |
|--------|-----------|--------|-----------------|-------------------------|---------|--------|-----------------|-------------------------|--------|
|        | Size      | BEDROC | Boot.<br>BEDROC | Std.<br>Boot.<br>BEDROC | Time    | BEDROC | Boot.<br>BEDROC | Std.<br>Boot.<br>BEDROC | BEDROC |
| aa2ar  | 22        | 0.74   | 0.74            | 0.02                    | 1388.29 | 0.55   | 0.55            | 0.02                    | 0.35   |
| abl1   | 19        | 0.62   | 0.62            | 0.04                    | 370.36  | 0.49   | 0.48            | 0.04                    | 0.19   |
| ace    | 21        | 0.54   | 0.54            | 0.03                    | 799.7   | 0.3    | 0.3             | 0.03                    | 0.04   |
| aces   | 14        | 0.71   | 0.71            | 0.02                    | 916.06  | 0.46   | 0.46            | 0.03                    | 0.15   |
| ada    | 17        | 0.77   | 0.77            | 0.04                    | 135.22  | 0.33   | 0.33            | 0.06                    | 0.07   |
| ada17  | 14        | 0.79   | 0.79            | 0.01                    | 1832.18 | 0.7    | 0.7             | 0.02                    | 0.37   |
| adrb1  | 14        | 0.53   | 0.53            | 0.04                    | 589.61  | 0.16   | 0.16            | 0.03                    | 0.13   |
| adrb2  | 19        | 0.44   | 0.43            | 0.04                    | 594.32  | 0.23   | 0.23            | 0.04                    | 0.15   |
| akt1   | 24        | 0.71   | 0.7             | 0.03                    | 812.16  | 0.45   | 0.45            | 0.03                    | 0.24   |
| akt2   | 21        | 0.7    | 0.7             | 0.04                    | 184.32  | 0.43   | 0.42            | 0.06                    | 0.11   |
| aldr   | 23        | 0.68   | 0.68            | 0.04                    | 371.02  | 0.54   | 0.54            | 0.04                    | 0.04   |
| ampc   | 15        | 0.72   | 0.72            | 0.07                    | 69.25   | 0.16   | 0.16            | 0.07                    | 0.01   |
| andr   | 15        | 0.6    | 0.6             | 0.03                    | 420.84  | 0.28   | 0.28            | 0.04                    | 0.17   |
| aofb   | 18        | 0.42   | 0.42            | 0.06                    | 164.75  | 0.21   | 0.21            | 0.05                    | 0.06   |
| bace1  | 28        | 0.33   | 0.32            | 0.04                    | 870.06  | 0.18   | 0.18            | 0.03                    | 0.13   |
| braf   | 9         | 0.61   | 0.61            | 0.04                    | 302.52  | 0.35   | 0.35            | 0.04                    | 0.21   |
| cah2   | 25        | 0.54   | 0.54            | 0.02                    | 1500.49 | 0.17   | 0.17            | 0.02                    | 0.05   |
| casp3  | 17        | 0.41   | 0.4             | 0.05                    | 392.34  | 0.19   | 0.19            | 0.04                    | 0.04   |
| cdk2   | 21        | 0.51   | 0.51            | 0.02                    | 1070.25 | 0.34   | 0.33            | 0.03                    | 0.21   |
| comt   | 26        | 0.99   | 0.99            | 0.01                    | 98.61   | 0.92   | 0.92            | 0.03                    | 0.15   |
| cp2c9  | 31        | 0.26   | 0.26            | 0.05                    | 250.77  | 0.11   | 0.11            | 0.04                    | 0.06   |
| cp3a4  | 22        | 0.25   | 0.25            | 0.04                    | 466.11  | 0.16   | 0.16            | 0.04                    | 0.06   |
| csf1r  | 13        | 0.59   | 0.59            | 0.04                    | 353.53  | 0.35   | 0.35            | 0.04                    | 0.11   |

|        |    |      |      |      |         |      |      |      |      |
|--------|----|------|------|------|---------|------|------|------|------|
| cxcr4  | 27 | 0.73 | 0.72 | 0.06 | 87.07   | 0.3  | 0.29 | 0.09 | 0.12 |
| def    | 18 | 0.91 | 0.91 | 0.02 | 168.79  | 0.74 | 0.74 | 0.04 | 0.1  |
| dhi1   | 17 | 0.42 | 0.41 | 0.03 | 656.72  | 0.19 | 0.19 | 0.03 | 0.07 |
| dpp4   | 27 | 0.66 | 0.66 | 0.02 | 2385.56 | 0.5  | 0.5  | 0.02 | 0.17 |
| drd3   | 21 | 0.45 | 0.45 | 0.03 | 1728.59 | 0.17 | 0.17 | 0.02 | 0.02 |
| dyr    | 22 | 0.76 | 0.76 | 0.03 | 752.26  | 0.61 | 0.61 | 0.03 | 0.36 |
| egfr   | 13 | 0.75 | 0.75 | 0.02 | 1696.56 | 0.43 | 0.43 | 0.02 | 0.34 |
| esr1   | 19 | 0.79 | 0.78 | 0.02 | 931.6   | 0.67 | 0.66 | 0.03 | 0.09 |
| esr2   | 20 | 0.8  | 0.79 | 0.02 | 892.88  | 0.6  | 0.6  | 0.03 | 0.12 |
| fa10   | 15 | 0.75 | 0.75 | 0.02 | 1404.37 | 0.59 | 0.59 | 0.02 | 0.2  |
| fa7    | 17 | 0.95 | 0.95 | 0.01 | 167.68  | 0.9  | 0.9  | 0.02 | 0.23 |
| fabp4  | 24 | 0.87 | 0.87 | 0.04 | 46.35   | 0.7  | 0.69 | 0.07 | 0.15 |
| fak1   | 14 | 0.71 | 0.71 | 0.05 | 133.74  | 0.48 | 0.48 | 0.06 | 0.3  |
| fgfr1  | 24 | 0.57 | 0.57 | 0.05 | 260.84  | 0.26 | 0.26 | 0.05 | 0.25 |
| fkf1a  | 26 | 0.73 | 0.73 | 0.04 | 182.83  | 0.34 | 0.34 | 0.06 | 0.15 |
| fnta   | 21 | 0.27 | 0.27 | 0.02 | 3158.1  | 0.1  | 0.1  | 0.01 | 0.04 |
| fpps   | 16 | 0.94 | 0.93 | 0.02 | 284.27  | 0.87 | 0.87 | 0.03 | 0.02 |
| gcr    | 17 | 0.54 | 0.54 | 0.04 | 445.71  | 0.29 | 0.29 | 0.04 | 0.12 |
| glcm   | 24 | 0.86 | 0.85 | 0.04 | 94.21   | 0.39 | 0.39 | 0.07 | 0.09 |
| gria2  | 31 | 0.73 | 0.72 | 0.03 | 499.57  | 0.57 | 0.57 | 0.04 | 0.43 |
| grik1  | 20 | 0.82 | 0.82 | 0.03 | 313.45  | 0.55 | 0.55 | 0.06 | 0.32 |
| hdac2  | 22 | 0.75 | 0.75 | 0.03 | 441.63  | 0.44 | 0.44 | 0.04 | 0.33 |
| hdac8  | 16 | 0.9  | 0.9  | 0.02 | 343.87  | 0.52 | 0.52 | 0.04 | 0.48 |
| hivint | 19 | 0.4  | 0.4  | 0.05 | 178.8   | 0.14 | 0.14 | 0.04 | 0.03 |
| hivpr  | 6  | 0.45 | 0.45 | 0.02 | 1395.58 | 0.29 | 0.29 | 0.02 | 0.02 |
| hivrt  | 15 | 0.46 | 0.46 | 0.03 | 807.05  | 0.18 | 0.18 | 0.03 | 0.19 |
| hmdh   | 19 | 0.86 | 0.86 | 0.02 | 276.17  | 0.4  | 0.4  | 0.05 | 0.11 |
| hs90a  | 21 | 0.76 | 0.75 | 0.05 | 108.64  | 0.2  | 0.2  | 0.05 | 0.27 |
| hvk4   | 18 | 0.78 | 0.78 | 0.04 | 94.63   | 0.48 | 0.47 | 0.07 | 0.45 |
| igf1r  | 24 | 0.59 | 0.59 | 0.04 | 253.57  | 0.34 | 0.34 | 0.05 | 0.24 |
| inha   | 21 | 0.72 | 0.71 | 0.07 | 47.37   | 0.45 | 0.44 | 0.1  | 0.19 |

|       |    |      |      |      |         |      |      |      |      |
|-------|----|------|------|------|---------|------|------|------|------|
| ital  | 25 | 0.47 | 0.47 | 0.05 | 226.85  | 0.28 | 0.28 | 0.05 | 0.09 |
| jak2  | 26 | 0.85 | 0.84 | 0.03 | 167.85  | 0.51 | 0.51 | 0.06 | 0.35 |
| kif11 | 27 | 0.87 | 0.87 | 0.02 | 181.51  | 0.77 | 0.77 | 0.04 | 0.16 |
| kit   | 18 | 0.41 | 0.41 | 0.05 | 365.22  | 0.16 | 0.16 | 0.03 | 0.07 |
| kith  | 32 | 0.97 | 0.97 | 0.01 | 72.85   | 0.88 | 0.88 | 0.03 | 0.62 |
| kpcb  | 18 | 0.77 | 0.77 | 0.03 | 271.21  | 0.62 | 0.62 | 0.05 | 0.53 |
| lck   | 15 | 0.63 | 0.63 | 0.02 | 1074.97 | 0.31 | 0.31 | 0.03 | 0.29 |
| lkha4 | 10 | 0.66 | 0.66 | 0.04 | 171.64  | 0.43 | 0.43 | 0.05 | 0.22 |
| mapk2 | 35 | 0.93 | 0.93 | 0.02 | 169.57  | 0.7  | 0.7  | 0.05 | 0.66 |
| mcr   | 11 | 0.65 | 0.65 | 0.06 | 70.06   | 0.25 | 0.24 | 0.08 | 0.1  |
| met   | 20 | 0.71 | 0.71 | 0.03 | 315.02  | 0.61 | 0.61 | 0.04 | 0.15 |
| mk01  | 21 | 0.64 | 0.64 | 0.06 | 120.41  | 0.34 | 0.34 | 0.06 | 0.23 |
| mk10  | 19 | 0.57 | 0.57 | 0.05 | 148.8   | 0.29 | 0.29 | 0.06 | 0.23 |
| mk14  | 20 | 0.45 | 0.45 | 0.03 | 1800.61 | 0.35 | 0.35 | 0.03 | 0.07 |
| mmp13 | 18 | 0.74 | 0.74 | 0.02 | 1957.67 | 0.56 | 0.56 | 0.02 | 0.17 |
| mp2k1 | 23 | 0.44 | 0.44 | 0.05 | 278.87  | 0.09 | 0.09 | 0.04 | 0.13 |
| nos1  | 25 | 0.69 | 0.69 | 0.04 | 262.55  | 0.38 | 0.38 | 0.06 | 0.38 |
| nram  | 24 | 0.95 | 0.95 | 0.01 | 178.38  | 0.47 | 0.47 | 0.05 | 0.34 |
| pa2ga | 22 | 0.76 | 0.75 | 0.04 | 119.99  | 0.45 | 0.45 | 0.06 | 0.06 |
| parp1 | 26 | 0.91 | 0.9  | 0.01 | 1388.88 | 0.71 | 0.71 | 0.02 | 0.62 |
| pde5a | 22 | 0.59 | 0.59 | 0.03 | 1351.57 | 0.47 | 0.47 | 0.03 | 0.31 |
| pgh1  | 13 | 0.41 | 0.4  | 0.05 | 356.61  | 0.2  | 0.2  | 0.04 | 0.05 |
| pgh2  | 12 | 0.65 | 0.65 | 0.03 | 834.71  | 0.33 | 0.33 | 0.03 | 0.25 |
| plk1  | 27 | 0.74 | 0.74 | 0.04 | 329.42  | 0.49 | 0.49 | 0.05 | 0.31 |
| pnph  | 26 | 0.92 | 0.92 | 0.02 | 168.52  | 0.63 | 0.63 | 0.05 | 0.64 |
| ppara | 13 | 0.42 | 0.42 | 0.03 | 509     | 0.09 | 0.09 | 0.02 | 0.08 |
| ppard | 10 | 0.53 | 0.53 | 0.04 | 356.9   | 0.16 | 0.16 | 0.03 | 0    |
| pparg | 21 | 0.49 | 0.49 | 0.03 | 1016.67 | 0.22 | 0.22 | 0.03 | 0.05 |
| prgr  | 25 | 0.77 | 0.77 | 0.02 | 571.18  | 0.34 | 0.34 | 0.04 | 0.4  |
| ptn1  | 16 | 0.72 | 0.72 | 0.04 | 231.03  | 0.49 | 0.49 | 0.05 | 0.17 |
| pur2  | 21 | 0.97 | 0.97 | 0.01 | 51.42   | 0.74 | 0.73 | 0.06 | 0.04 |

|       |       |      |      |      |         |      |      |      |      |
|-------|-------|------|------|------|---------|------|------|------|------|
| pygm  | 19    | 0.51 | 0.51 | 0.07 | 83.16   | 0.22 | 0.23 | 0.06 | 0    |
| pyrd  | 19    | 0.84 | 0.84 | 0.03 | 143.15  | 0.61 | 0.61 | 0.05 | 0.23 |
| reni  | 11    | 0.66 | 0.66 | 0.05 | 160.31  | 0.38 | 0.37 | 0.06 | 0.24 |
| rock1 | 20    | 0.72 | 0.71 | 0.04 | 174.39  | 0.29 | 0.29 | 0.05 | 0.29 |
| rxra  | 21    | 0.95 | 0.95 | 0.01 | 131.3   | 0.65 | 0.65 | 0.05 | 0.69 |
| sahh  | 22    | 0.98 | 0.98 | 0.01 | 45.68   | 0.91 | 0.9  | 0.03 | 0.54 |
| src   | 13    | 0.55 | 0.56 | 0.02 | 1596.35 | 0.26 | 0.26 | 0.02 | 0.15 |
| tgfr1 | 18    | 0.87 | 0.87 | 0.02 | 272.91  | 0.58 | 0.57 | 0.04 | 0.43 |
| thb   | 14    | 0.83 | 0.83 | 0.03 | 132.72  | 0.56 | 0.55 | 0.05 | 0.45 |
| thrb  | 15    | 0.77 | 0.77 | 0.02 | 1122.75 | 0.44 | 0.44 | 0.03 | 0.11 |
| try1  | 16    | 0.92 | 0.92 | 0.01 | 1158.06 | 0.77 | 0.77 | 0.02 | 0.12 |
| tryb1 | 16    | 0.81 | 0.81 | 0.03 | 241.66  | 0.54 | 0.54 | 0.05 | 0.11 |
| tysy  | 20    | 0.65 | 0.65 | 0.05 | 185.15  | 0.38 | 0.38 | 0.06 | 0.26 |
| urok  | 20    | 0.94 | 0.94 | 0.01 | 439.94  | 0.89 | 0.89 | 0.02 | 0.44 |
| vgfr2 | 14    | 0.53 | 0.53 | 0.03 | 958.08  | 0.33 | 0.33 | 0.03 | 0.14 |
| wee1  | 22    | 1    | 1    | 0    | 156.2   | 0.97 | 0.97 | 0.01 | 0.7  |
| xiap  | 24    | 0.97 | 0.97 | 0.01 | 124.81  | 0.87 | 0.87 | 0.03 | 0.56 |
|       |       |      |      |      |         |      |      |      |      |
| Mean  | 19.68 | 0.69 | 0.68 | 0.03 | 553.31  | 0.44 | 0.44 | 0.04 | 0.22 |

Table TS5. VS performance of different scoring methods for the DUD-E database when EF at the first 1% of screened data is used as model selection criterion and weighted scoring components are employed

| Target <sup>(a)</sup> | Opt. EF <sup>(b)</sup> | CompScore           |                   |                         |                              |                               |                               | BISC              |                         |                              |                               | ASC               |                               |
|-----------------------|------------------------|---------------------|-------------------|-------------------------|------------------------------|-------------------------------|-------------------------------|-------------------|-------------------------|------------------------------|-------------------------------|-------------------|-------------------------------|
|                       |                        | Size <sup>(c)</sup> | EF <sup>(d)</sup> | Boot. EF <sup>(e)</sup> | Std. Boot. EF <sup>(f)</sup> | Fract. Opt. EF <sup>(g)</sup> | Time (seconds) <sup>(h)</sup> | EF <sup>(d)</sup> | Boot. EF <sup>(e)</sup> | Std. Boot. EF <sup>(f)</sup> | Fract. Opt. EF <sup>(g)</sup> | EF <sup>(d)</sup> | Fract. Opt. EF <sup>(g)</sup> |
| aa2ar                 | 66.17                  | 27                  | 46.61             | 46.3                    | 1.69                         | 0.70                          | 1360.07                       | 33.71             | 33.97                   | 1.71                         | 0.51                          | 19.35             | 0.29                          |
| abl1                  | 59.61                  | 24                  | 29.81             | 28.81                   | 2.84                         | 0.50                          | 343.29                        | 25.39             | 24.98                   | 2.63                         | 0.43                          | 11.59             | 0.19                          |
| ace                   | 60.77                  | 24                  | 29.14             | 28.71                   | 2.32                         | 0.48                          | 707.33                        | 15.99             | 16.16                   | 2.05                         | 0.26                          | 1.78              | 0.03                          |
| aces                  | 51.64                  | 15                  | 35.86             | 35.65                   | 1.92                         | 0.69                          | 835.67                        | 20.52             | 20.23                   | 1.65                         | 0.40                          | 6.99              | 0.14                          |
| ada                   | 59.35                  | 31                  | 44.52             | 42.78                   | 3.63                         | 0.75                          | 176.7                         | 19.08             | 18.68                   | 3.43                         | 0.32                          | 3.18              | 0.05                          |
| ada17                 | 68.15                  | 26                  | 51.25             | 51.04                   | 1.68                         | 0.75                          | 1621.2                        | 42.8              | 42.83                   | 1.97                         | 0.63                          | 21.59             | 0.32                          |
| adrb1                 | 62.23                  | 32                  | 27.88             | 27.66                   | 2.38                         | 0.45                          | 664.69                        | 9.29              | 9.23                    | 1.79                         | 0.15                          | 8.49              | 0.14                          |
| adrb2                 | 58.77                  | 23                  | 24.82             | 24.03                   | 2.43                         | 0.42                          | 511.15                        | 11.75             | 11.64                   | 2.05                         | 0.20                          | 6.97              | 0.12                          |
| akt1                  | 56.53                  | 22                  | 38.61             | 38.11                   | 2.23                         | 0.68                          | 640.26                        | 23.44             | 23.34                   | 2.05                         | 0.41                          | 11.72             | 0.21                          |
| akt2                  | 59.36                  | 24                  | 39.57             | 39.04                   | 4.14                         | 0.67                          | 236.88                        | 23.23             | 22.8                    | 3.69                         | 0.39                          | 6.88              | 0.12                          |
| aldr                  | 57.13                  | 20                  | 38.93             | 38.09                   | 2.93                         | 0.68                          | 345                           | 27                | 27.69                   | 2.95                         | 0.47                          | 2.51              | 0.04                          |
| ampc                  | 59.94                  | 25                  | 37.2              | 34.5                    | 5.37                         | 0.62                          | 78.06                         | 8.27              | 7.57                    | 3.54                         | 0.14                          | 0                 | 0.00                          |
| andr                  | 59.84                  | 22                  | 34.19             | 33.47                   | 2.54                         | 0.57                          | 432.27                        | 13.05             | 13.16                   | 2.24                         | 0.22                          | 7.65              | 0.13                          |
| aofb                  | 57.55                  | 36                  | 16.68             | 15.94                   | 3.07                         | 0.29                          | 212.74                        | 11.68             | 10.75                   | 2.65                         | 0.20                          | 3.34              | 0.06                          |
| bace1                 | 65.61                  | 26                  | 17.11             | 17.02                   | 2.06                         | 0.26                          | 755.62                        | 9.63              | 9.45                    | 1.79                         | 0.15                          | 7.13              | 0.11                          |
| braf                  | 66.15                  | 28                  | 32.09             | 31.09                   | 3.07                         | 0.49                          | 388.47                        | 19.65             | 19.56                   | 2.85                         | 0.30                          | 11.79             | 0.18                          |
| cah2                  | 64.1                   | 28                  | 32.35             | 32.36                   | 1.73                         | 0.50                          | 1539.16                       | 9.97              | 9.79                    | 1.27                         | 0.16                          | 3.05              | 0.05                          |
| casp3                 | 54.64                  | 31                  | 14.54             | 14.14                   | 2.23                         | 0.27                          | 424.39                        | 10.03             | 9.82                    | 1.93                         | 0.18                          | 3.01              | 0.06                          |
| cdk2                  | 59.56                  | 26                  | 29.25             | 28.93                   | 1.73                         | 0.49                          | 1126.07                       | 17.05             | 16.91                   | 1.49                         | 0.29                          | 12.63             | 0.21                          |
| comt                  | 94.27                  | 30                  | 91.85             | 90.53                   | 3.1                          | 0.97                          | 120.68                        | 79.77             | 78.29                   | 4.9                          | 0.85                          | 7.25              | 0.08                          |
| cp2c9                 | 61.89                  | 40                  | 15.05             | 13.84                   | 3.07                         | 0.24                          | 300.88                        | 5.85              | 5.41                    | 1.95                         | 0.09                          | 4.18              | 0.07                          |

|        |       |    |       |       |      |      |         |       |       |      |      |       |      |
|--------|-------|----|-------|-------|------|------|---------|-------|-------|------|------|-------|------|
| cp3a4  | 70.18 | 32 | 12.87 | 12.58 | 2.46 | 0.18 | 476.93  | 10.53 | 10.21 | 2.19 | 0.15 | 2.92  | 0.04 |
| csf1r  | 73.81 | 16 | 36.61 | 35.74 | 3.04 | 0.50 | 411.72  | 24    | 23.7  | 2.85 | 0.33 | 6.6   | 0.09 |
| cxcr4  | 86.02 | 27 | 51.61 | 49.64 | 6.45 | 0.60 | 100.45  | 19.66 | 19.46 | 6.01 | 0.23 | 9.83  | 0.11 |
| def    | 58.46 | 21 | 58.46 | 57.01 | 2.39 | 1.00 | 182.59  | 37.3  | 37.85 | 3.59 | 0.64 | 5.04  | 0.09 |
| dhi1   | 58.9  | 26 | 19.63 | 19.46 | 2.04 | 0.33 | 749.89  | 8.76  | 8.82  | 1.5  | 0.15 | 3.62  | 0.06 |
| dpp4   | 77.65 | 33 | 44.45 | 43.87 | 1.73 | 0.57 | 2007.78 | 33.38 | 33.42 | 1.84 | 0.43 | 10.5  | 0.14 |
| drd3   | 70.5  | 27 | 27.24 | 26.89 | 1.78 | 0.39 | 1442.11 | 9.77  | 10.11 | 1.32 | 0.14 | 1.66  | 0.02 |
| dyr    | 75.66 | 25 | 52.18 | 51.52 | 2.75 | 0.69 | 749.7   | 39.14 | 39.24 | 2.65 | 0.52 | 22.18 | 0.29 |
| egfr   | 65.57 | 13 | 48.95 | 48.67 | 1.52 | 0.75 | 1431.16 | 25.86 | 25.4  | 1.57 | 0.39 | 19.39 | 0.30 |
| esr1   | 54.86 | 23 | 46.16 | 45.57 | 1.81 | 0.84 | 786.89  | 34.29 | 34.05 | 2.07 | 0.63 | 4.48  | 0.08 |
| esr2   | 55.88 | 20 | 46.34 | 45.76 | 1.64 | 0.83 | 773.7   | 29.99 | 29.95 | 1.96 | 0.54 | 6.54  | 0.12 |
| fa10   | 53.51 | 22 | 41.2  | 40.76 | 1.5  | 0.77 | 1213.58 | 28.71 | 28.59 | 1.48 | 0.54 | 10.63 | 0.20 |
| fa7    | 55.5  | 28 | 55.5  | 55.09 | 1.06 | 1.00 | 211.04  | 55.5  | 55    | 1.12 | 1.00 | 12.14 | 0.22 |
| fabp4  | 58.09 | 29 | 47.71 | 46.56 | 5.71 | 0.82 | 71.02   | 39.41 | 37.53 | 5.73 | 0.68 | 12.45 | 0.21 |
| fak1   | 54.7  | 23 | 32.82 | 32.59 | 4.25 | 0.60 | 162.36  | 23.87 | 22.58 | 3.45 | 0.44 | 14.92 | 0.27 |
| fgfr1  | 58.67 | 33 | 30.8  | 29.52 | 3.3  | 0.52 | 275.61  | 16.13 | 16.18 | 2.87 | 0.27 | 11.73 | 0.20 |
| fkbl1a | 53.19 | 26 | 41.66 | 40.14 | 3.36 | 0.78 | 193.73  | 17.73 | 17.45 | 3.14 | 0.33 | 7.09  | 0.13 |
| fnta   | 87.58 | 29 | 15.69 | 15.44 | 1.37 | 0.18 | 2605.19 | 7.09  | 7.17  | 1.04 | 0.08 | 3.04  | 0.03 |
| fpps   | 97.77 | 18 | 86.49 | 86.15 | 3.46 | 0.88 | 320.17  | 76.46 | 76.25 | 4.39 | 0.78 | 1.25  | 0.01 |
| gcr    | 69.67 | 23 | 30.48 | 30.1  | 2.81 | 0.44 | 490.28  | 17.42 | 17.54 | 2.33 | 0.25 | 7.74  | 0.11 |
| glcm   | 70.24 | 30 | 61    | 58.69 | 4.87 | 0.87 | 114.7   | 25.88 | 23.56 | 4.97 | 0.37 | 5.55  | 0.08 |
| gria2  | 75.45 | 32 | 48.82 | 48.78 | 3.83 | 0.65 | 520.88  | 36.14 | 35.81 | 3.43 | 0.48 | 25.36 | 0.34 |
| grik1  | 65.78 | 38 | 43.85 | 42.43 | 4.01 | 0.67 | 278.72  | 30.9  | 31.63 | 4.32 | 0.47 | 16.94 | 0.26 |
| hdac2  | 57.73 | 31 | 41.08 | 40.44 | 3.11 | 0.71 | 428.48  | 28.31 | 28.29 | 2.88 | 0.49 | 18.87 | 0.33 |
| hdac8  | 63.06 | 19 | 63.06 | 61.95 | 1.55 | 1.00 | 401.33  | 32.72 | 32.2  | 2.84 | 0.52 | 26.77 | 0.42 |
| hivint | 67.98 | 32 | 20.99 | 19.55 | 3.57 | 0.31 | 281.91  | 9     | 8.84  | 2.68 | 0.13 | 3     | 0.04 |
| hivpr  | 67.72 | 14 | 24.95 | 24.6  | 1.61 | 0.37 | 1561.48 | 17.26 | 17.13 | 1.42 | 0.25 | 0.94  | 0.01 |
| hivrt  | 55.77 | 26 | 22.37 | 22.09 | 1.96 | 0.40 | 696.29  | 8.65  | 8.69  | 1.43 | 0.16 | 9.25  | 0.17 |
| hmdh   | 52.33 | 21 | 48.8  | 47.84 | 1.89 | 0.93 | 313.26  | 19.4  | 19.41 | 2.56 | 0.37 | 5.29  | 0.10 |
| hs90a  | 62.82 | 22 | 46.15 | 45.72 | 4.97 | 0.73 | 142.66  | 14.1  | 14.91 | 3.68 | 0.22 | 19.23 | 0.31 |
| hxx4   | 48.66 | 21 | 40.01 | 39.05 | 3.88 | 0.82 | 117.68  | 20.55 | 20.62 | 4.29 | 0.42 | 20.55 | 0.42 |

|       |       |    |       |       |      |      |         |       |       |      |      |       |      |
|-------|-------|----|-------|-------|------|------|---------|-------|-------|------|------|-------|------|
| igf1r | 63.61 | 30 | 34.82 | 33.83 | 3.13 | 0.55 | 353.42  | 18.75 | 17.88 | 2.73 | 0.29 | 11.38 | 0.18 |
| inha  | 53.11 | 32 | 39.84 | 37.86 | 5.68 | 0.75 | 59.64   | 19.92 | 20.01 | 5.69 | 0.38 | 8.85  | 0.17 |
| ital  | 62.3  | 33 | 23.9  | 22.84 | 3.03 | 0.38 | 314.91  | 15.21 | 15.39 | 2.88 | 0.24 | 5.07  | 0.08 |
| jak2  | 61.28 | 25 | 52.92 | 52.02 | 3.3  | 0.86 | 226.61  | 26    | 25.68 | 3.74 | 0.42 | 19.5  | 0.32 |
| kif11 | 59.9  | 27 | 55.62 | 53.86 | 2.95 | 0.93 | 254.08  | 44.49 | 44.89 | 3.25 | 0.74 | 10.27 | 0.17 |
| kit   | 63.67 | 24 | 19.22 | 18.42 | 2.65 | 0.30 | 389.06  | 9.61  | 9.38  | 2.2  | 0.15 | 3.6   | 0.06 |
| kith  | 50.91 | 39 | 50.91 | 50.54 | 1.12 | 1.00 | 95.72   | 50.91 | 49.42 | 2.73 | 1.00 | 28.85 | 0.57 |
| kpcb  | 65.99 | 33 | 47.24 | 46.79 | 3.7  | 0.72 | 330.47  | 34.5  | 34.56 | 3.78 | 0.52 | 30.75 | 0.47 |
| lck   | 66.11 | 21 | 36.75 | 36.5  | 1.96 | 0.56 | 1175.48 | 17.66 | 17.8  | 1.67 | 0.27 | 16.23 | 0.25 |
| lkha4 | 45.6  | 27 | 26.06 | 25.46 | 2.73 | 0.57 | 250.72  | 17.77 | 18.41 | 2.51 | 0.39 | 11.25 | 0.25 |
| mapk2 | 62.12 | 39 | 61.13 | 60.1  | 1.78 | 0.98 | 244.36  | 41.41 | 40.73 | 3.8  | 0.67 | 38.46 | 0.62 |
| mcr   | 82.51 | 19 | 38.38 | 37.19 | 5.84 | 0.47 | 95.18   | 15.35 | 15.14 | 4.97 | 0.19 | 5.76  | 0.07 |
| met   | 68.51 | 22 | 45.67 | 44.66 | 3.02 | 0.67 | 387.48  | 34.86 | 35.17 | 3.45 | 0.51 | 9.62  | 0.14 |
| mk01  | 57.71 | 45 | 32.62 | 30.95 | 4.5  | 0.57 | 165.74  | 21.33 | 20.24 | 4.02 | 0.37 | 11.29 | 0.20 |
| mk10  | 64.21 | 27 | 37.38 | 35.84 | 3.95 | 0.58 | 250.5   | 16.29 | 16.33 | 3.24 | 0.25 | 12.46 | 0.19 |
| mk14  | 62.79 | 21 | 25.08 | 24.97 | 1.56 | 0.40 | 1519.57 | 17.99 | 18.07 | 1.43 | 0.29 | 3.63  | 0.06 |
| mmp13 | 65.73 | 21 | 46.85 | 46.78 | 1.61 | 0.71 | 1684.44 | 34.79 | 34.64 | 1.61 | 0.53 | 10.84 | 0.16 |
| mp2k1 | 68.14 | 21 | 24.93 | 24.06 | 3.66 | 0.37 | 276.09  | 6.65  | 6.57  | 2.27 | 0.10 | 9.14  | 0.13 |
| nos1  | 81.82 | 32 | 47.47 | 45.67 | 4.1  | 0.58 | 319.46  | 24.24 | 24.26 | 3.76 | 0.30 | 22.22 | 0.27 |
| nram  | 64.07 | 35 | 63.05 | 62.16 | 1.85 | 0.98 | 246.09  | 27.46 | 27.65 | 3.72 | 0.43 | 17.29 | 0.27 |
| pa2ga | 52.91 | 23 | 41.93 | 40.68 | 3.93 | 0.79 | 153     | 22.96 | 22.76 | 3.35 | 0.43 | 2.99  | 0.06 |
| parp1 | 60.03 | 44 | 57.67 | 57.16 | 1.12 | 0.96 | 1542.55 | 40.54 | 40.46 | 1.61 | 0.68 | 32.87 | 0.55 |
| pde5a | 69.94 | 35 | 35.34 | 34.94 | 1.87 | 0.51 | 1241.17 | 27.32 | 27.28 | 1.95 | 0.39 | 17.8  | 0.25 |
| pgh1  | 57.04 | 17 | 20.1  | 19.87 | 2.87 | 0.35 | 310.05  | 9.24  | 9.5   | 2.02 | 0.16 | 2.17  | 0.04 |
| pgh2  | 52.47 | 22 | 32.5  | 32.13 | 1.8  | 0.62 | 808.63  | 15.89 | 15.84 | 1.59 | 0.30 | 13    | 0.25 |
| plk1  | 64.84 | 30 | 46.99 | 45.36 | 3.3  | 0.72 | 229.59  | 27.25 | 26.82 | 4    | 0.42 | 16.91 | 0.26 |
| pnph  | 68    | 30 | 66.08 | 64.68 | 2.61 | 0.97 | 235.27  | 40.23 | 40.17 | 4.26 | 0.59 | 36.39 | 0.54 |
| ppara | 48.87 | 22 | 19.06 | 18.7  | 1.75 | 0.39 | 602.02  | 3.76  | 3.68  | 0.98 | 0.08 | 3.49  | 0.07 |
| ppard | 50.17 | 10 | 24.88 | 24.55 | 2.23 | 0.50 | 371.88  | 8.29  | 8.25  | 1.7  | 0.17 | 0     | 0.00 |
| pparg | 53.06 | 28 | 24.67 | 24.31 | 1.64 | 0.46 | 1074.09 | 10.78 | 10.77 | 1.31 | 0.20 | 2.9   | 0.05 |
| prgr  | 58.68 | 24 | 46.95 | 45.93 | 2.01 | 0.80 | 536.39  | 17.81 | 18.23 | 2.1  | 0.30 | 19.02 | 0.32 |

|       |       |       |       |       |      |      |         |       |       |      |      |       |      |
|-------|-------|-------|-------|-------|------|------|---------|-------|-------|------|------|-------|------|
| ptn1  | 56.37 | 18    | 39.61 | 39.07 | 3.87 | 0.70 | 220.75  | 26.66 | 26.92 | 3.4  | 0.47 | 7.62  | 0.14 |
| pur2  | 54.66 | 34    | 54.66 | 53.47 | 2.65 | 1.00 | 70.3    | 39.04 | 38.83 | 4.74 | 0.71 | 1.95  | 0.04 |
| pygm  | 52    | 29    | 16.49 | 15.1  | 3.75 | 0.32 | 118.73  | 13.95 | 13.8  | 3.46 | 0.27 | 0     | 0.00 |
| pyrd  | 55.87 | 27    | 50.55 | 49.15 | 3.38 | 0.90 | 179.65  | 31.04 | 31.1  | 4.26 | 0.56 | 10.64 | 0.19 |
| reni  | 67.76 | 17    | 37.22 | 36.64 | 4.04 | 0.55 | 201.44  | 19.09 | 18.97 | 3.88 | 0.28 | 14.32 | 0.21 |
| rock1 | 63.74 | 26    | 43.82 | 41.46 | 3.86 | 0.69 | 212.65  | 15.94 | 15.94 | 3.31 | 0.25 | 16.93 | 0.27 |
| rxra  | 53.25 | 25    | 53.25 | 52.9  | 0.94 | 1.00 | 166.48  | 32.45 | 33    | 3.17 | 0.61 | 35.78 | 0.67 |
| sahh  | 48.02 | 34    | 48.02 | 47.65 | 1.03 | 1.00 | 70      | 46.36 | 45.59 | 2.87 | 0.97 | 28.15 | 0.59 |
| src   | 66.49 | 14    | 34.01 | 33.95 | 1.71 | 0.51 | 1373.12 | 14.52 | 14.66 | 1.43 | 0.22 | 8.22  | 0.12 |
| tgfr1 | 64.23 | 29    | 59    | 57.11 | 2.68 | 0.92 | 288.13  | 34.35 | 33.81 | 3.1  | 0.53 | 23.15 | 0.36 |
| thb   | 66.72 | 32    | 55.43 | 53.54 | 3.57 | 0.83 | 195.05  | 31.82 | 31.45 | 3.89 | 0.48 | 26.69 | 0.40 |
| thrb  | 59.91 | 16    | 47.23 | 46.99 | 1.66 | 0.79 | 1174.91 | 25.36 | 25.4  | 1.65 | 0.42 | 5.9   | 0.10 |
| try1  | 58.56 | 21    | 58.11 | 57.95 | 0.6  | 0.99 | 1123.07 | 44.76 | 44.62 | 1.45 | 0.76 | 5.57  | 0.10 |
| tryb1 | 52.41 | 16    | 44.35 | 43.59 | 2.29 | 0.85 | 256.36  | 25.53 | 24.95 | 2.87 | 0.49 | 5.38  | 0.10 |
| tysy  | 62.61 | 36    | 35.39 | 33.72 | 3.66 | 0.57 | 272.54  | 19.96 | 19.87 | 3.54 | 0.32 | 12.7  | 0.20 |
| urok  | 61.56 | 28    | 60.94 | 59.83 | 1.77 | 0.99 | 419.33  | 57.86 | 57.2  | 1.92 | 0.94 | 25.24 | 0.41 |
| vgfr2 | 57.28 | 17    | 28.51 | 28.16 | 1.8  | 0.50 | 831.42  | 15.62 | 15.67 | 1.78 | 0.27 | 8.43  | 0.15 |
| wee1  | 61.16 | 38    | 61.16 | 61.15 | 0.09 | 1.00 | 222.52  | 61.16 | 61.12 | 0.24 | 1.00 | 40.77 | 0.67 |
| xiap  | 52.3  | 44    | 52.3  | 52    | 0.82 | 1.00 | 194.12  | 49.34 | 48.61 | 1.98 | 0.94 | 27.63 | 0.53 |
| Mean  | 62.24 | 26.46 | 40.40 | 39.59 | 2.72 | 0.65 | 545.77  | 25.09 | 24.92 | 2.74 | 0.41 | 12.02 | 0.20 |

<sup>(a)</sup> Target identification on the DUD-E database (<http://dude.docking.org/>)

<sup>(b)</sup> EF at 1% of screened data for a perfect ranking of the active compounds on the ranked list

<sup>(c)</sup> Number of aggregated scoring functions

<sup>(d)</sup> EF of the best performing VS strategy

<sup>(e)</sup> Mean EF on 1000 bootstrap simulations of the best performing VS strategy

<sup>(f)</sup> Standard deviation of the bootstrap cross-validation procedure

<sup>(g)</sup> Fraction of the maximum possible EF that the VS method achieves

<sup>(h)</sup> Run time for each consensus scoring approach

Table TS6. VS performance on external validation experiments. Enrichment is computed as BEDROC with  $\alpha$  is set to 160.9. Results are presented as the average BEDROC over the 100 training/external partitions of each target

| Target <sup>(a)</sup> | BEDROC               |                            |                     |                           |
|-----------------------|----------------------|----------------------------|---------------------|---------------------------|
|                       | Train <sup>(b)</sup> | Std (Train) <sup>(c)</sup> | Ext. <sup>(d)</sup> | Std (Ext.) <sup>(e)</sup> |
| aa2ar                 | 0.73                 | 0.01                       | 0.71                | 0.05                      |
| abl1                  | 0.60                 | 0.02                       | 0.57                | 0.07                      |
| ace                   | 0.52                 | 0.02                       | 0.48                | 0.06                      |
| aces                  | 0.65                 | 0.01                       | 0.62                | 0.06                      |
| ada                   | 0.76                 | 0.02                       | 0.64                | 0.10                      |
| ada17                 | 0.78                 | 0.01                       | 0.77                | 0.04                      |
| adrb1                 | 0.48                 | 0.02                       | 0.41                | 0.07                      |
| adrb2                 | 0.44                 | 0.02                       | 0.35                | 0.07                      |
| akt1                  | 0.69                 | 0.01                       | 0.63                | 0.06                      |
| akt2                  | 0.64                 | 0.02                       | 0.59                | 0.11                      |
| aldr                  | 0.60                 | 0.03                       | 0.53                | 0.10                      |
| ampc                  | 0.67                 | 0.04                       | 0.52                | 0.19                      |
| andr                  | 0.54                 | 0.02                       | 0.50                | 0.07                      |
| aofb                  | 0.41                 | 0.03                       | 0.26                | 0.10                      |
| bace1                 | 0.33                 | 0.02                       | 0.24                | 0.07                      |
| braf                  | 0.61                 | 0.02                       | 0.55                | 0.09                      |
| cah2                  | 0.52                 | 0.01                       | 0.49                | 0.05                      |
| casp3                 | 0.38                 | 0.03                       | 0.30                | 0.09                      |
| cdk2                  | 0.48                 | 0.01                       | 0.43                | 0.06                      |
| comt                  | 0.99                 | 0.01                       | 0.96                | 0.04                      |
| cp2c9                 | 0.27                 | 0.02                       | 0.09                | 0.07                      |
| cp3a4                 | 0.26                 | 0.02                       | 0.14                | 0.07                      |
| csf1r                 | 0.51                 | 0.03                       | 0.44                | 0.09                      |
| cxcr4                 | 0.73                 | 0.03                       | 0.51                | 0.16                      |
| def                   | 0.91                 | 0.01                       | 0.88                | 0.05                      |

|        |      |      |      |      |
|--------|------|------|------|------|
| dhi1   | 0.35 | 0.02 | 0.30 | 0.08 |
| dpp4   | 0.64 | 0.01 | 0.63 | 0.05 |
| drd3   | 0.43 | 0.01 | 0.41 | 0.05 |
| dyr    | 0.75 | 0.01 | 0.72 | 0.06 |
| egfr   | 0.75 | 0.01 | 0.73 | 0.04 |
| esr1   | 0.76 | 0.01 | 0.74 | 0.05 |
| esr2   | 0.74 | 0.01 | 0.72 | 0.05 |
| fa10   | 0.72 | 0.01 | 0.71 | 0.04 |
| fa7    | 0.95 | 0.01 | 0.93 | 0.03 |
| fabp4  | 0.77 | 0.04 | 0.60 | 0.16 |
| fak1   | 0.70 | 0.03 | 0.58 | 0.12 |
| fgfr1  | 0.56 | 0.03 | 0.47 | 0.11 |
| fkbl1a | 0.71 | 0.03 | 0.64 | 0.11 |
| fnta   | 0.22 | 0.01 | 0.19 | 0.04 |
| fpps   | 0.91 | 0.01 | 0.89 | 0.05 |
| gcr    | 0.48 | 0.02 | 0.41 | 0.08 |
| glcm   | 0.85 | 0.02 | 0.72 | 0.13 |
| gria2  | 0.70 | 0.02 | 0.65 | 0.07 |
| grik1  | 0.84 | 0.02 | 0.77 | 0.08 |
| hdac2  | 0.74 | 0.02 | 0.70 | 0.07 |
| hdac8  | 0.90 | 0.01 | 0.88 | 0.04 |
| hivint | 0.33 | 0.02 | 0.15 | 0.07 |
| hivpr  | 0.30 | 0.01 | 0.27 | 0.04 |
| hivrt  | 0.44 | 0.02 | 0.37 | 0.06 |
| hmdh   | 0.83 | 0.01 | 0.80 | 0.07 |
| hs90a  | 0.77 | 0.02 | 0.69 | 0.11 |
| hvk4   | 0.75 | 0.02 | 0.67 | 0.10 |
| igf1r  | 0.55 | 0.02 | 0.43 | 0.10 |
| inha   | 0.73 | 0.04 | 0.43 | 0.18 |
| ital   | 0.45 | 0.03 | 0.39 | 0.12 |
| jak2   | 0.80 | 0.02 | 0.72 | 0.09 |

|       |      |      |      |      |
|-------|------|------|------|------|
| kif11 | 0.83 | 0.02 | 0.78 | 0.07 |
| kit   | 0.38 | 0.02 | 0.30 | 0.09 |
| kith  | 0.96 | 0.01 | 0.92 | 0.05 |
| kpcb  | 0.74 | 0.02 | 0.69 | 0.08 |
| lck   | 0.61 | 0.01 | 0.60 | 0.05 |
| lkha4 | 0.61 | 0.02 | 0.48 | 0.10 |
| mapk2 | 0.92 | 0.01 | 0.87 | 0.06 |
| mcr   | 0.53 | 0.04 | 0.43 | 0.14 |
| met   | 0.67 | 0.02 | 0.64 | 0.08 |
| mk01  | 0.63 | 0.03 | 0.43 | 0.15 |
| mk10  | 0.57 | 0.02 | 0.41 | 0.11 |
| mk14  | 0.41 | 0.01 | 0.39 | 0.05 |
| mmp13 | 0.68 | 0.01 | 0.66 | 0.04 |
| mp2k1 | 0.40 | 0.02 | 0.31 | 0.10 |
| nos1  | 0.68 | 0.02 | 0.61 | 0.10 |
| nram  | 0.95 | 0.01 | 0.93 | 0.04 |
| pa2ga | 0.74 | 0.02 | 0.66 | 0.12 |
| parp1 | 0.90 | 0.01 | 0.90 | 0.02 |
| pde5a | 0.57 | 0.01 | 0.54 | 0.05 |
| pgh1  | 0.41 | 0.02 | 0.33 | 0.09 |
| pgh2  | 0.63 | 0.01 | 0.60 | 0.05 |
| plk1  | 0.71 | 0.02 | 0.61 | 0.10 |
| pnph  | 0.91 | 0.01 | 0.87 | 0.05 |
| ppara | 0.41 | 0.04 | 0.36 | 0.08 |
| ppard | 0.46 | 0.02 | 0.40 | 0.09 |
| pparg | 0.46 | 0.02 | 0.44 | 0.06 |
| prgr  | 0.76 | 0.01 | 0.72 | 0.05 |
| ptn1  | 0.71 | 0.02 | 0.62 | 0.10 |
| pur2  | 0.97 | 0.01 | 0.92 | 0.05 |
| pygm  | 0.43 | 0.06 | 0.23 | 0.13 |
| pyrd  | 0.82 | 0.02 | 0.76 | 0.07 |

|       |      |      |      |      |
|-------|------|------|------|------|
| reni  | 0.67 | 0.02 | 0.61 | 0.09 |
| rock1 | 0.69 | 0.02 | 0.57 | 0.11 |
| rxra  | 0.95 | 0.01 | 0.94 | 0.03 |
| sahh  | 0.98 | 0.01 | 0.93 | 0.06 |
| src   | 0.53 | 0.01 | 0.52 | 0.05 |
| tgfr1 | 0.85 | 0.01 | 0.83 | 0.06 |
| thb   | 0.81 | 0.02 | 0.74 | 0.08 |
| thrb  | 0.76 | 0.01 | 0.75 | 0.04 |
| try1  | 0.92 | 0.01 | 0.91 | 0.02 |
| tryb1 | 0.79 | 0.01 | 0.76 | 0.07 |
| tysy  | 0.63 | 0.02 | 0.53 | 0.11 |
| urok  | 0.93 | 0.01 | 0.91 | 0.03 |
| vgfr2 | 0.48 | 0.02 | 0.45 | 0.06 |
| wee1  | 1.00 | 0.00 | 0.98 | 0.01 |
| xiap  | 0.96 | 0.01 | 0.94 | 0.03 |

(a) Target identification on the DUD-E database (<http://dude.docking.org/>)

(b) Mean BEDROC on the training set over 100 data splits

(c) Standard deviation of BEDROC on the training set over 100 data splits

(d) Mean BEDROC on the external set over 100 data splits

(e) Standard deviation of BEDROC on the external set over 100 data splits
